# Supplementary material for: Salmonella Effector SteE Converts the Mammalian Serine/Threonine Kinase GSK3 into a Tyrosine Kinase to Direct Macrophage Polarization
Source: PubMed Central journal article supplement (PMC6953433; doi:10.1016/j.chom.2019.11.002), 2020-01-08
Supplement: mmc2.pdf [file mmc2.pdf]

# Cell Host & Microbe

## *Salmonella* Effector SteE Converts the Mammalian Serine/Threonine Kinase GSK3 into a Tyrosine Kinase to Direct Macrophage Polarization

### Graphical Abstract

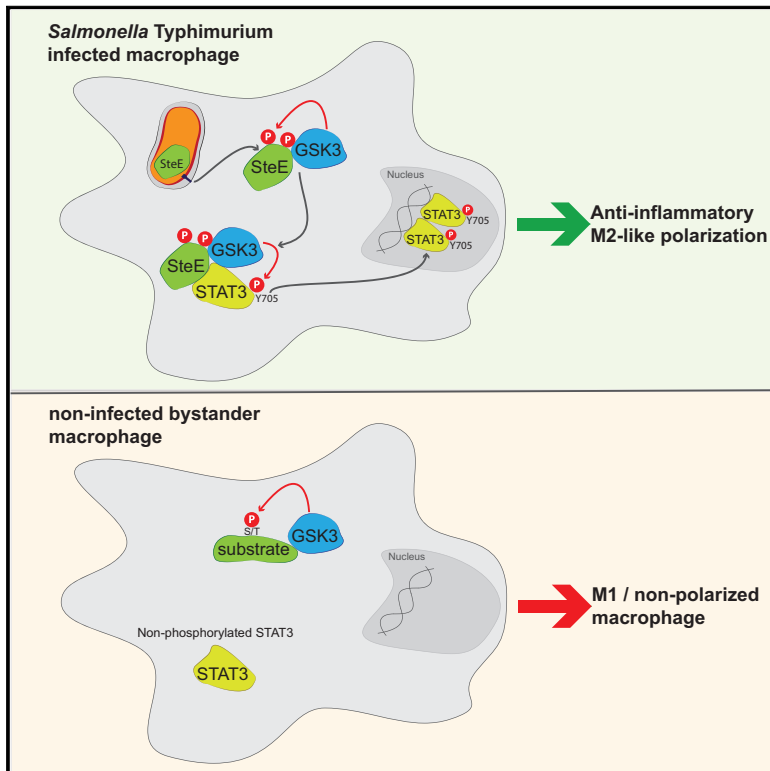

### Authors

Ioanna Panagi, Elliott Jennings, Jingkun Zeng, ..., Denise M. Monack, Sophie Helaine, Teresa L.M. Thurston

### Correspondence

t.thurston@imperial.ac.uk

### In Brief

Numerous bacterial effectors modulate host immune responses via diverse biochemical activities. Panagi et al. report that the *Salmonella* effector SteE enables the pleiotropic host serine/threonine kinase GSK3 to phosphorylate a tyrosine residue on the non-canonical substrate STAT3. By triggering this substrate switch in GSK3, SteE creates an anti-inflammatory, infection-permissive environment.

### Highlights

- *Salmonella* effector SteE drives M2 macrophage polarization via GSK3 and STAT3
- SteE alters the substrate and amino acid specificity of the host kinase GSK3
- SteE enables GSK3, a S/T kinase, to phosphorylate STAT3 on Y705
- SteE requires GSK3-mediated phosphorylation to function

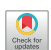

# *Salmonella* Effector SteE Converts the Mammalian Serine/Threonine Kinase GSK3 into a Tyrosine Kinase to Direct Macrophage Polarization

Ioanna Panagi,<sup>1,3</sup> Elliott Jennings,<sup>1,3</sup> Jingkun Zeng,<sup>1</sup> Regina A. Günster,<sup>1</sup> Cullum D. Stones,<sup>1</sup> Hazel Mak,<sup>1</sup> Enkai Jin,<sup>1</sup> Daphne A.C. Stapels,<sup>1</sup> Nur. Z. Subari,<sup>1</sup> Trung H.M. Pham,<sup>2</sup> Susan M. Brewer,<sup>2</sup> Samantha Y.Q. Ong,<sup>1</sup> Denise M. Monack,<sup>2</sup> Sophie Helaine,<sup>1</sup> and Teresa L.M. Thurston<sup>1,4,\*</sup>

<sup>1</sup>MRC Centre for Molecular Bacteriology and Infection, Imperial College London, London, UK

<sup>2</sup>Departments of Microbiology and Immunology, Stanford University, Stanford, CA, USA

<sup>3</sup>These authors contributed equally

<sup>4</sup>Lead Contact

\*Correspondence: [t.thurston@imperial.ac.uk](mailto:t.thurston@imperial.ac.uk)

<https://doi.org/10.1016/j.chom.2019.11.002>

## SUMMARY

Many Gram-negative bacterial pathogens antagonize anti-bacterial immunity through translocated effector proteins that inhibit pro-inflammatory signaling. In addition, the intracellular pathogen *Salmonella enterica* serovar Typhimurium initiates an anti-inflammatory transcriptional response in macrophages through its effector protein SteE. However, the target(s) and molecular mechanism of SteE remain unknown. Here, we demonstrate that SteE converts both the amino acid and substrate specificity of the host pleiotropic serine/threonine kinase GSK3. SteE itself is a substrate of GSK3, and phosphorylation of SteE is required for its activity. Remarkably, phosphorylated SteE then forces GSK3 to phosphorylate the non-canonical substrate signal transducer and activator of transcription 3 (STAT3) on tyrosine-705. This results in STAT3 activation, which along with GSK3 is required for SteE-mediated upregulation of the anti-inflammatory M2 macrophage marker interleukin-4R $\alpha$  (IL-4R $\alpha$ ). Overall, the conversion of GSK3 to a tyrosine-directed kinase represents a tightly regulated event that enables a bacterial virulence protein to reprogram innate immune signaling and establish an anti-inflammatory environment.

## INTRODUCTION

The delivery of effector proteins into host cells enables pathogenesis of *Salmonella enterica* serovar Typhimurium. Effector translocation from intracellular bacteria is dependent on the *Salmonella* pathogenicity island-2 type III secretion system (T3SS) (Jennings et al., 2017). Numerous effectors suppress host inflammatory immune responses via diverse biochemical activities, including proteolysis (Jennings et al., 2018; Sun et al., 2016), arginine-GlcNAcylation (Gunster et al., 2017; Li

et al., 2013), ubiquitination (Haraga and Miller, 2003), and elimination (Mazurkiewicz et al., 2008). As well as dampening host immune signaling pathways, it is now appreciated that *Salmonella* also induces anti-inflammatory pathways within the host. SteE (also referred to as STM2585 or SarA) stimulates the production of a key anti-inflammatory cytokine, interleukin-10 (IL-10), by activating the host transcription factor signal transducer and activator of transcription 3 (STAT3) (Jaslow et al., 2018). STAT3 is involved in many aspects of cell biology. After stimulation with cytokines such as IL-6 and IL-10, cytoplasmic STAT3 becomes phosphorylated on Y705 (Darnell et al., 1994; Schindler and Darnell, 1995). This results in STAT3 homodimerization, nuclear translocation, and expression of anti-inflammatory genes. It is known that *Salmonella* activates STAT3 in macrophages (Lin and Bost, 2004), but only recently was SteE identified as the key effector responsible (Jaslow et al., 2018). Although SteE interacts with STAT3, the mechanism driving STAT3 activation remains unknown.

More recently, it has been reported that SteE also directs macrophage polarization toward an anti-inflammatory M2-like state (Stapels et al., 2018). Macrophages are professional mononuclear phagocytes whose physiological state is plastic and context dependent. A simplified representation consists of classically activated pro-inflammatory M1 macrophages and alternatively activated M2 subtypes that are considered to be anti-inflammatory (Shapouri-Moghaddam et al., 2018). The polarization of macrophages to an M1 phenotype after stimulation with molecules such as lipopolysaccharide (LPS) and interferon- $\gamma$  (IFN- $\gamma$ ) requires activation of downstream transcriptional regulators such as nuclear factor  $\kappa$ B (NF- $\kappa$ B) and STAT1 (Shuai et al., 1994). The resulting macrophages are anti-microbial with high levels of nitric oxide (NO) and produce pro-inflammatory cytokines such as tumor necrosis factor  $\alpha$  (TNF- $\alpha$ ). In contrast, stimulation of macrophages with IL-4 or IL-10 leads to M2 polarization dependent on the activation of STAT3 or STAT6 (Wang et al., 2014). Intriguingly, emerging evidence suggests that M2-polarized macrophages are associated with intracellular *Salmonella* growth and persistence (Eisele et al., 2013; McCoy et al., 2012; Saliba et al., 2016). Additionally, studies utilizing murine models of salmonellosis have demonstrated that SteE is important for the virulence and long-term persistence of

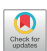

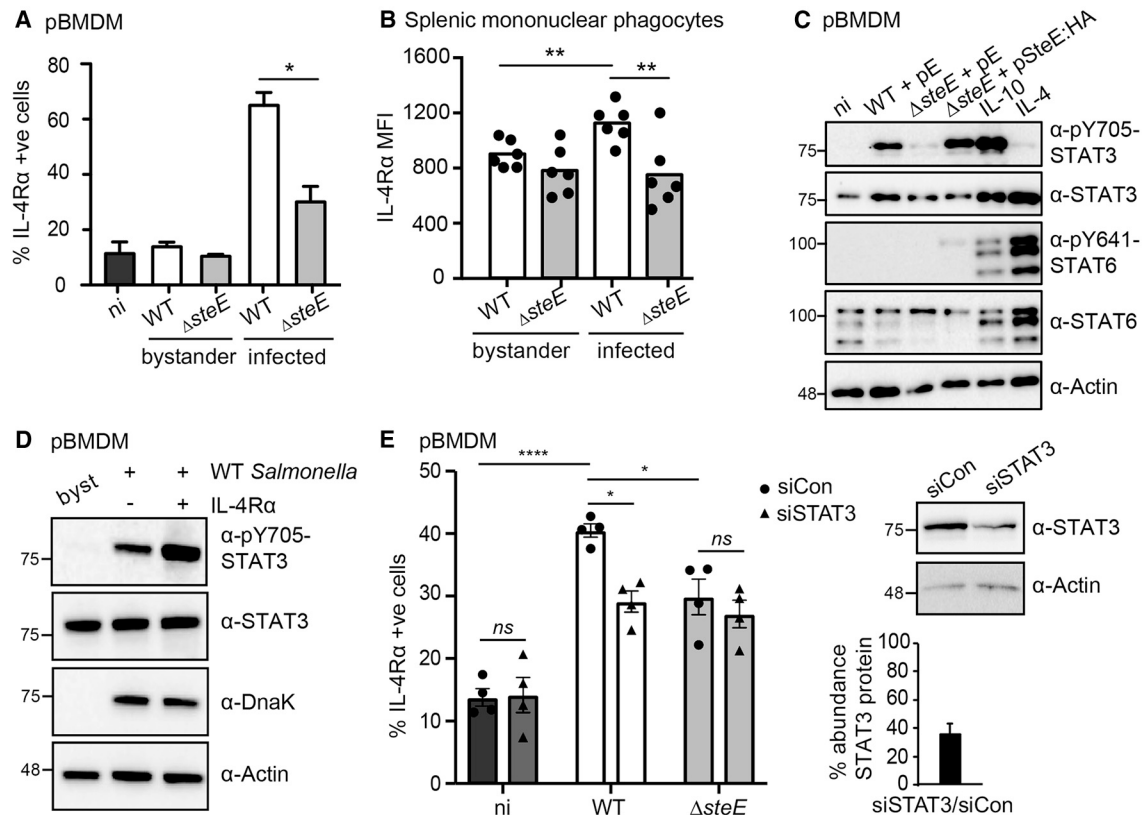

**Figure 1. M2 Macrophage Polarization Is SteE and STAT3 Dependent**

(A) Percentage of IL-4R $\alpha$ <sup>+</sup> pBMDMs in naive, non-infected bystander or infected cells 17 h after uptake. Cells were infected with WT or *steE* mutant *Salmonella* carrying the fluorescent plasmid pFCcGi (see Figure S1A for gating). Data represent the mean and SEM of four independent experiments (one-way ANOVA with Dunnett's multiple-comparison test, \**p* < 0.05).

(B) Median fluorescent intensity (MFI) of IL-4R $\alpha$  signal from CD11b<sup>+</sup>MHCII<sup>+</sup>F4/80<sup>+</sup> and Ly6G<sup>-</sup> mononuclear phagocytes isolated from the spleens of C57BL/6 *Nramp*<sup>+/+</sup> mice (see Figure S1B for gating). Mice were infected with WT or *steE* mutant *Salmonella* via intraperitoneal inoculation, and spleens were harvested 10 days after infection. Bars represent the geometric median; dots represent individual mice. Significance was calculated with a two-tailed Mann-Whitney test (\**p* < 0.05, \*\**p* < 0.01). Data represent three independent experiments with four to six mice analyzed per group per experiment.

(C) Protein immunoblots of whole-cell lysates derived from primary bone-marrow-derived macrophages (pBMDMs) infected with WT, *steE* mutant, or *steE* mutant *Salmonella* carrying a plasmid expressing SteE:HA. pE denotes that the strain carries an empty plasmid. Lysates were harvested 17 h after uptake. Alternatively, pBMDMs were stimulated with 20 mg/mL IL-4 or IL-10 for 17 h, as indicated. Immunoblots are representative of three independent experiments.

(D) pBMDMs were infected with WT *Salmonella* carrying the fluorescent plasmid pFCcGi for 18 h and then FACS sorted according to whether they were non-infected bystanders (bysts), infected IL4R $\alpha$ <sup>-</sup>, or infected IL4R $\alpha$ <sup>+</sup>. Only infected cells with a similar bacterial burden were collected (Figure S1C). Sorted cells were then lysed and analyzed by immunoblot with the indicated antibodies. Data are representative of two independent repeats.

(E) Percentage of IL-4R $\alpha$ <sup>+</sup> non-infected or infected pBMDMs 17 h after uptake of WT + pFCcGi or *steE* mutant + pFCcGi *Salmonella* after treatment with control (siCon) or STAT3 siRNA for 2 days. Data represent mean and SEM of four independent experiments (two-way ANOVA with Tukey's multiple-comparison test, \**p* < 0.05, \*\**p* < 0.01; ns, not significant). Inset: immunoblot for STAT3 levels in control or STAT3 siRNA-treated pBMDMs with quantification from three independent repeats shown as mean and SEM.

*Salmonella* at systemic sites of infection (Jaslow et al., 2018; Lawley et al., 2006; Niemann et al., 2011). Despite this progress, the molecular details of how SteE drives M2-like polarization are lacking entirely, and the link between SteE-induced STAT3 activation and macrophage polarization is unknown. It is also unclear how SteE functions biochemically, because it is a small and apparently non-enzymatic protein. Here, we report that SteE alters the substrate specificity of host glycogen synthase kinase 3 (GSK3) and thus endows this serine/threonine (S/T) kinase with the ability to phosphorylate a tyrosine residue on the non-canonical substrate STAT3, ultimately driving macrophage polarization.

## RESULTS

### *Salmonella*-Mediated M2 Macrophage Polarization Is SteE and STAT3 Dependent

Infection of primary bone-marrow-derived macrophages (pBMDMs) by *Salmonella* Typhimurium polarizes cells into an anti-inflammatory M2-like state that is dependent on SteE (Stapels et al., 2018). In agreement, we found an SteE-dependent upregulation of the M2 marker IL-4R $\alpha$  in infected, but not non-infected, bystander cells in both pBMDMs (Figures 1A and S1A) and splenic mononuclear phagocytes (Figures 1B and S1B). This shows that SteE-dependent macrophage polarization is

cell intrinsic, even when other signaling events and immune cells are present. M2 polarization is associated with activated STAT3 (pY705) and STAT6 (pY641) (Wang et al., 2014), and in agreement with others (Jaslow et al., 2018), SteE induced STAT3 phosphorylation (Figure 1C). However, infection with wild-type (WT) *Salmonella* did not induce STAT6 phosphorylation (Figure 1C). Therefore, we hypothesized that SteE mediates the polarization of macrophages through phosphorylation and activation of STAT3.

To test this, we analyzed the relative degree of STAT3 phosphorylation in IL-4R $\alpha$ <sup>-</sup> and IL-4R $\alpha$ <sup>+</sup> cell populations. pBMDMs were infected with fluorescent WT *Salmonella* (Figueira et al., 2013) and sorted into three populations by fluorescence-activated cell sorting (FACS): non-infected bystanders, infected IL-4R $\alpha$ <sup>-</sup>, and infected IL-4R $\alpha$ <sup>+</sup>. The gating strategy selected an equivalent bacterial burden in the different infected populations (Figure S1C). Virtually no pY705-STAT3 was detected in cell lysates from non-infected bystanders. In contrast, STAT3 phosphorylation was detected in infected samples, which showed a stronger pY705-STAT3 signal in infected IL-4R $\alpha$ <sup>+</sup> cells than in IL-4R $\alpha$ <sup>-</sup> cells (Figure 1D). To test directly whether STAT3 is required for *Salmonella*-mediated upregulation of IL-4R $\alpha$  protein levels, we treated pBMDMs with a small interfering RNA (siRNA)-targeting STAT3 and then infected cells with fluorescent WT or *steE* mutant *Salmonella*. In control siRNA-treated cells, WT *Salmonella* caused an SteE-dependent upregulation in IL-4R $\alpha$  levels. In contrast, WT *Salmonella* did not increase the levels of IL-4R $\alpha$  significantly in siSTAT3-treated pBMDMs (Figures 1E and S1D). We conclude that SteE drives cell-intrinsic M2-like macrophage polarization through the activation of the transcription factor STAT3.

### SteE Interacts with GSK3 $\alpha$ and GSK3 $\beta$ as well as STAT3

Next, we investigated how SteE induces STAT3 phosphorylation and activation. Exploiting the fact that GFP-tagged SteE is sufficient to induce STAT3 phosphorylation in HeLa cells (Jaslow et al., 2018; Figure S2A) and 293ET cells (Figure 2A), we tested whether GFP-SteE immunoprecipitated from 293ET cells could phosphorylate recombinant His-STAT3 in an *in vitro* kinase assay. Immunoprecipitated GFP-SteE induced phosphorylation of His-STAT3 upon the addition of ATP, whereas the GFP control sample did not (Figure 2B). This suggests that either SteE is a kinase or it associates with a kinase to which it remains bound during immunoprecipitation.

Because SteE is composed of only 157 amino acids and does not resemble either a bacterial or mammalian kinase, we hypothesized that a host interaction partner (or partners) of SteE might be responsible for STAT3 phosphorylation. To this end, GFP or GFP-SteE was immunoprecipitated from 293ET cells, and the samples were analyzed by mass spectrometry. The identified proteins that were unique or highly enriched in the GFP-SteE samples from three independent repeats are shown in Table 1. We then tested whether SteE:HA, translocated by *Salmonella*, interacted with the top three hits: heat shock 70 kDa protein 1-like (HSPA1L), GSK3 $\alpha$ , and GSK3 $\beta$ . HSPA1L was not detected in SteE:HA immunoprecipitated samples from infected pBMDM cells (Figure 2C). In contrast, translocated SteE:HA, but not the unrelated effector protein SseL (SseL:HA), immunoprecipitated endogenous GSK3 $\alpha$  and GSK3 $\beta$  from pBMDMs (Figure 2C), 293ET cells (Figure S2B), and HeLa cells (Figure S2C). Exoge-

nously expressed SteE has previously been found to interact with STAT3 (Jaslow et al., 2018), and translocated SteE:HA, but not SseL:HA, also interacted with endogenous STAT3 (Figure 2C). No interaction was detected between STAT6 and SteE:HA (Figure 2C). The activated Y705-phosphorylated form of STAT3 was also detected in SteE:HA immunoprecipitated samples, providing additional evidence that STAT3 is phosphorylated in an SteE-containing complex (Figure S2B). Therefore, GSK3 $\alpha$ , GSK3 $\beta$ , and STAT3 interact with SteE in infected cells.

Through the analysis of GSK3 $\beta$  deletion mutants, the minimal region required for the interaction with SteE was identified as amino acids 56–384; truncations into the kinase domain from either the N or C terminus resulted in loss of the interaction (Figure S2D). This led us to hypothesize that GSK3 kinase activity is required for the interaction between GSK3 and SteE. FLAG-tagged GSK3 $\alpha$  or GSK3 $\beta$  interacted specifically with co-expressed immunoprecipitated GFP-SteE, whereas the catalytically inactive ATP-binding-deficient point mutants (GSK3 $\alpha$ <sup>K148A</sup> and GSK3 $\beta$ <sup>K85A</sup>) did not (Figure 2D). Endogenous GSK3 was efficiently immunoprecipitated from all GFP-SteE-containing samples (Figure 2D). This shows that SteE only interacts with the enzymatically active form of GSK3.

### Catalytically Active GSK3 Is Required for SteE-Induced STAT3 Activation and Macrophage Polarization

GSK3 $\alpha$  and GSK3 $\beta$  are S/T kinases that share a highly similar (98%) kinase domain and phosphorylate several common substrates but are not redundant. GSK3 $\alpha$  negatively regulates STAT3 activity in atherosclerosis (McAlpine et al., 2015), whereas GSK3 $\beta$  indirectly promotes the phosphorylation of Y705 on STAT3 via membrane-associated tyrosine kinases (Beurel and Jope, 2008; Gao et al., 2017). To investigate whether GSK3 activity is required for *Salmonella*-mediated phosphorylation of STAT3, we used immunofluorescence microscopy to monitor pY705-STAT3 localization in *Salmonella*-infected HeLa cells treated with the GSK3 kinase inhibitor CHIR99021. As expected, infection of DMSO-treated cells with WT *Salmonella* resulted in a strong nuclear accumulation of pY705-STAT3 (Figures 3A and S3A). In contrast, very few cells showed nuclear accumulation of pY705-STAT3 in *steE*-mutant-infected or CHIR99021-treated cells, suggesting that nuclear accumulation of pY705-STAT3 is dependent on both SteE and GSK3 activity (Figure 3A). Next, the ability of SteE to induce Y705-STAT3 phosphorylation was examined by immunoblotting. In both pBMDMs and HeLa cells, WT-*Salmonella*-induced Y705-STAT3 phosphorylation was strongly inhibited by the addition of CHIR99021 (Figures 3B and S3B). CHIR99021 did not reduce residual Y705-phosphorylated STAT3 in *steE* mutant infected cells (Figures 3B and S3B), IL-10-induced STAT3 activation, or the activation of STAT6 by IL-4 or IL-10 (Figure S3C). This suggests that CHIR99021 specifically inhibits SteE-dependent STAT3 phosphorylation. Finally, we tested whether CHIR99021 also prevented SteE-mediated upregulation of IL-4R $\alpha$  in pBMDMs. CHIR99021 caused a minor reduction in DnaK levels in pBMDMs (Figure 3B) but not in HeLa cells (Figure S3B). This decrease in bacterial burden was quantified in pBMDMs by flow cytometry (Figures S3D and S3E), and a refined gate that selected for a similar bacterial burden in both DMSO- and CHIR99021-treated samples was used (Figures S3D and S3F).

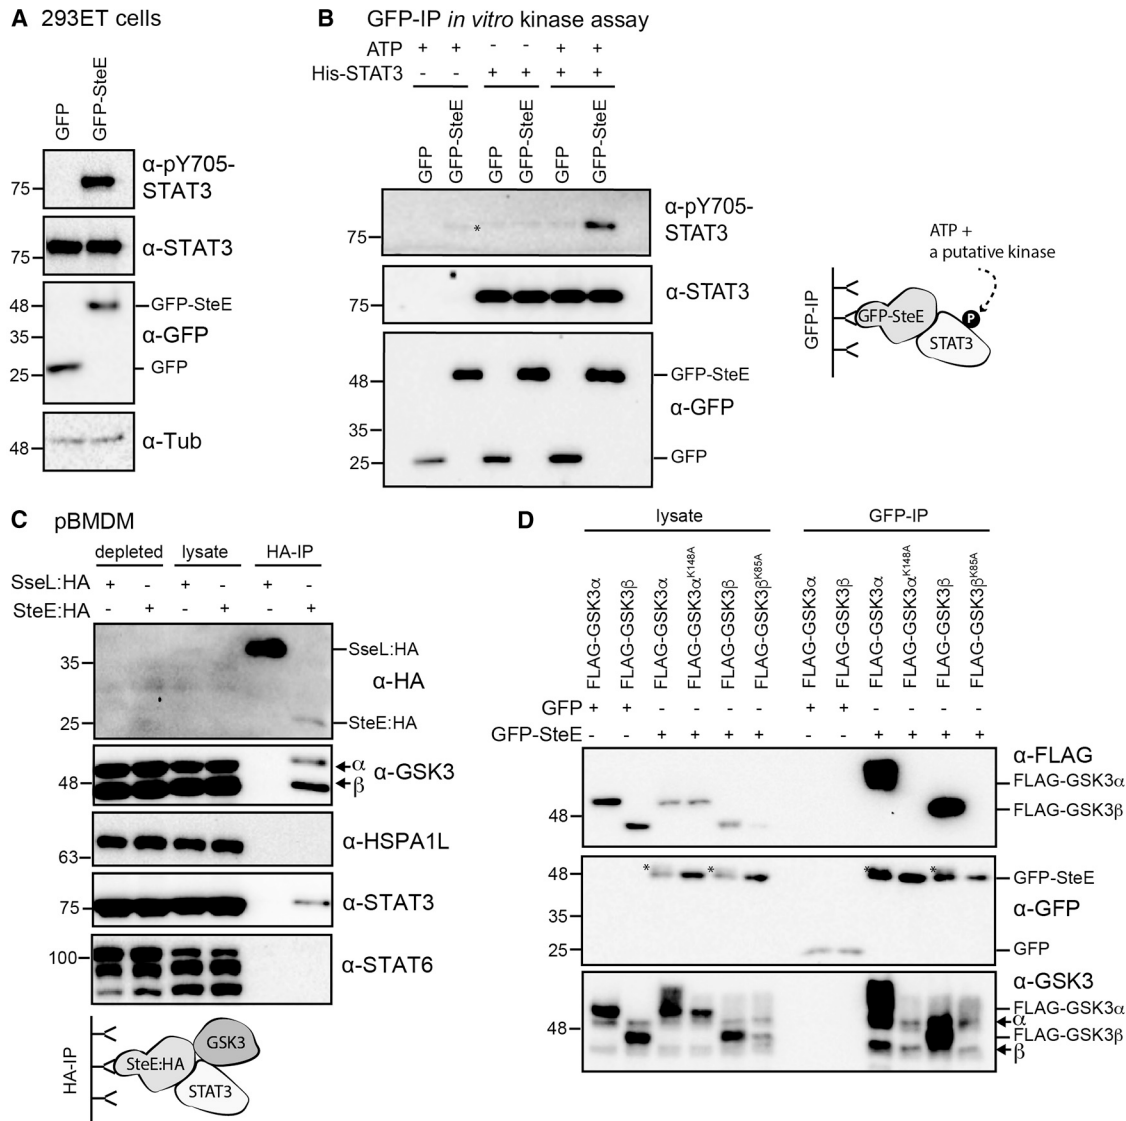

With this gate, *Salmonella* infection caused ~40% of infected cells to become IL-4R $\alpha^+$  in DMSO-treated cells but only ~10% of infected cells to become IL-4R $\alpha^+$  in the CHIR99021-treated cells (Figure 3C). CHIR99021 did not significantly alter the amount of IL-4R $\alpha^+$  cells infected with *steE*-mutant bacteria (Figure 3C) or when macrophages were polarized with IL-10 (Figure S3G). Collectively, these data show that GSK3 kinase activity

is required specifically for SteE- but not IL-10-mediated Y705-STAT3 phosphorylation and upregulation of the M2 marker IL-4R $\alpha$  during *Salmonella* infection.

Given that SteE interacted with both GSK3 $\alpha$  and GSK3 $\beta$  (Figure 2C), we next tested whether either one or both kinases are required for SteE-induced STAT3 activation. To this end, GSK3 $\alpha^{-/-}$ , GSK3 $\beta^{-/-}$ , and GSK3 $\alpha/\beta^{-/-}$  knockout 293ET cell

**Table 1. Putative SteE Interaction Partners Identified by Mass Spectrometry**

| Protein Name                               | Gene Name                      | Unique Peptides | Average Ion Score | Specific/Non-specific Ratio |
|--------------------------------------------|--------------------------------|-----------------|-------------------|-----------------------------|
| Heat shock 70 kDa protein 1-like           | <i>HSPA1L</i>                  | 22/26/23        | 36,891 (17,867)   | ∞                           |
| Glycogen synthase kinase-3 alpha           | <i>GSK3<math>\alpha</math></i> | 19/15/20        | 4,814 (949)       | ∞                           |
| Glycogen synthase kinase-3 beta            | <i>GSK3<math>\beta</math></i>  | 15/14/18        | 4,741 (356)       | ∞                           |
| Heat shock protein 105 kDa                 | <i>HSPH1</i>                   | 18/24/26        | 2,380 (709)       | ∞                           |
| Heat shock 70 kDa protein 4L               | <i>HSPA4L</i>                  | 12/8/9          | 634 (177)         | ∞                           |
| GrpE protein homolog 1, mitochondrial      | <i>GRPEL1</i>                  | 6/11/8          | 914 (495)         | ∞                           |
| BAG family molecular chaperone regulator 5 | <i>BAG5</i>                    | 4/4/6           | 442 (208)         | ∞                           |
| WD repeat-containing protein 54            | <i>WDR54</i>                   | 1/1/1           | 136 (44)          | ∞                           |
| Heat shock 70 kDa protein 1A               | <i>HSPA1A</i>                  | 51/60/49        | 92,417 (32,920)   | 43,057 (3,755)              |
| Heat shock cognate 71 kDa protein          | <i>HSPA8</i>                   | 38/46/38        | 17,707 (3,301)    | 6,824 (843)                 |
| 78 kDa glucose-regulated protein           | <i>HSPA5</i>                   | 33/41/22        | 7,252 (2,344)     | 4,819 (485)                 |
| Stress-70 protein, mitochondrial           | <i>HSPA9</i>                   | 34/45/36        | 8,546 (3,769)     | 2,416 (489)                 |
| Heat shock 70 kDa protein 4                | <i>HSPA4</i>                   | 34/35/34        | 3,868 (384)       | 1,440 (114)                 |
| E3 ubiquitin-protein ligase CHIP           | <i>STUB1</i>                   | 11/12/9         | 1,679 (184)       | 1,192 (56)                  |
| BAG family molecular chaperone regulator 2 | <i>BAG2</i>                    | 4/6/6           | 611 (236)         | 491 (33)                    |

Proteins that were specific or highly enriched in the GFP-SteE sample, compared with the GFP control, are shown. Data were obtained from three independent experiments, and the number of unique peptides from each experiment shown together with an average ion score; SD is given in parentheses.

lines were generated with the use of CRISPR/Cas9. Infection of WT, *GSK3 $\alpha$ <sup>-/-</sup>*, or *GSK3 $\beta$ <sup>-/-</sup>* cells with WT *Salmonella* resulted in a similar amount of Y705-phosphorylated STAT3, which was no longer detected in lysates from *GSK3 $\alpha/\beta$ <sup>-/-</sup>* cells, despite similar total STAT3 levels (Figure 3D). *steE* mutant bacteria carrying a plasmid expressing SteE:HA restored STAT3 Y705 phosphorylation in infected WT, *GSK3 $\alpha$ <sup>-/-</sup>*, and *GSK3 $\beta$ <sup>-/-</sup>* cells but not in *GSK3 $\alpha/\beta$ <sup>-/-</sup>* cells (Figure 3D). This shows that in the context of *Salmonella*-induced STAT3 activation, *GSK3 $\alpha$*  and *GSK3 $\beta$*  are redundant.

During the course of these experiments, we found that although similar amounts of effector were detected inside bacteria (pellet fraction), translocated SteE:HA (post-nuclear supernatant [PNS] fraction) was barely detected in the absence of *GSK3* (Figure S4A). This requirement for *GSK3* was specific to SteE; translocated SseL:HA was detected in CHIR99021-treated and in *GSK3 $\alpha/\beta$ <sup>-/-</sup>* cells (Figure S4A), and SseL:HA and another effector PipB:HA were detected by immunofluorescence microscopy in DMSO- and CHIR99021-treated WT 293ET cells and *GSK3 $\alpha/\beta$ <sup>-/-</sup>* cells (Figure S4B). We conclude that *GSK3* prevents degradation of translocated SteE.

In contrast, exogenously expressed GFP-SteE remained stable in the absence of *GSK3* (Figure 3E). Therefore, to test the requirement of *GSK3* in STAT3 phosphorylation, independently of its requirement in preventing SteE degradation, we expressed GFP or GFP-SteE in *GSK3*-knockout cells. In WT, *GSK3 $\alpha$ <sup>-/-</sup>*, or *GSK3 $\beta$ <sup>-/-</sup>* cells, GFP-SteE induced a similar amount of STAT3 Y705 phosphorylation without altering the levels of total STAT3. In contrast, in three independently generated *GSK3 $\alpha/\beta$ <sup>-/-</sup>* clones, GFP-SteE induced minimal STAT3 Y705 phosphorylation (Figures 3E and S4C). Finally, we analyzed pY705-STAT3 levels from *GSK3 $\alpha/\beta$ <sup>-/-</sup>* cells expressing either active or inactive *GSK3* variants. Only the expression of WT *GSK3 $\alpha$*  or WT *GSK3 $\beta$*  was sufficient to enable GFP-SteE-mediated STAT3 activation (Figure 3F). In summary, the kinase

activity of either *GSK3 $\alpha$*  or *GSK3 $\beta$*  is required for both stabilizing translocated SteE and enabling SteE-mediated Y705-STAT3 phosphorylation and thereby macrophage polarization.

### SteE Enables *GSK3* to Form a Complex with STAT3 in which SteE and STAT3 Are Phosphorylated

Next, we investigated the molecular basis for the requirement of *GSK3* in SteE-induced STAT3 phosphorylation. Because STAT3 becomes phosphorylated in an SteE-containing complex (Figure 2B), we first questioned whether *GSK3* is required for the interaction between SteE and STAT3. Exogenously expressed GFP-SteE, which was readily detected in both WT and *GSK3 $\alpha/\beta$ <sup>-/-</sup>* cells, interacted with endogenous STAT3 in WT 293ET cells but not in *GSK3 $\alpha/\beta$ <sup>-/-</sup>* cells (Figure 4A), showing that *GSK3* is critical for the interaction of SteE with STAT3.

Because *GSK3* can interact with STAT3 (Beurel and Jope, 2008), we tested whether this occurs with or without SteE. In non-infected 293ET cells, or in cells infected with *steE* mutant bacteria, an interaction between GFP-*GSK3 $\alpha$*  or GFP-*GSK3 $\beta$*  and STAT3 was not detected. However, upon infection with *steE* mutant bacteria expressing SteE:HA, both GFP-*GSK3 $\alpha$*  and GFP-*GSK3 $\beta$*  interacted with STAT3 (Figure 4B). In the presence of SteE, Y705-phosphorylated STAT3 was also detected in the GFP-*GSK3 $\alpha$*  immunoprecipitated samples (Figure 4B). To investigate this further, we carried out *in vitro* kinase assays after immunoprecipitation of *GSK3*. Recombinant GST-STAT3 was phosphorylated only when GFP-*GSK3 $\alpha$*  or GFP-*GSK3 $\beta$*  was immunoprecipitated from cells infected with bacteria expressing SteE:HA. This was enhanced by addition of ATP (Figure S5A). We conclude that SteE potentiates a *GSK3*-STAT3 interaction that results in STAT3 phosphorylation.

After analysis of our *GSK3*-immunoprecipitated *in vitro* kinase assays, we noted several higher-molecular-weight bands on the anti-HA immunoblot for detection of SteE:HA (Figure S5A). In addition, bacterially delivered SteE:HA migrated as a doublet

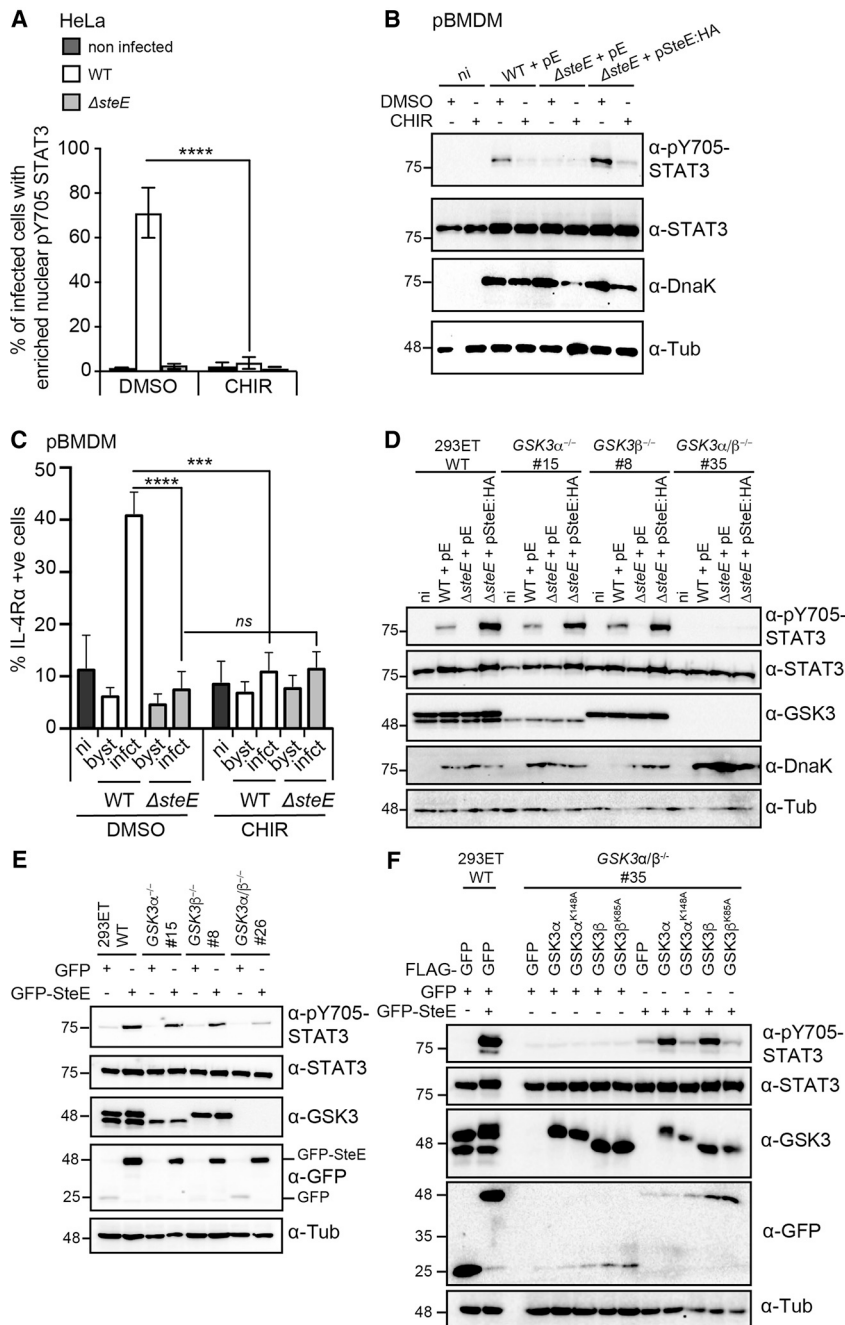

**Figure 3. GSK3 Is Required for *Salmonella*-Induced Phosphorylation of STAT3 and Macrophage Polarization**

(A) HeLa cells were infected with the indicated *Salmonella* strains and then treated with either DMSO or 5  $\mu$ M GSK3 inhibitor CHIR99021 1 h after infection. 17 h after infection, the cells were fixed, permeabilized, and then labeled for Y705-phosphorylated STAT3, CSA1 (*Salmonella*), and DAPI (nucleus) (Figure S3A). The frequency of infected cells with enriched nuclear pY705-STAT3 signal was enumerated by eye. Data are the mean and SEM of three independent repeats where at least 100 infected cells were blind scored. \*\*\*\*p < 0.0001, one-way ANOVA with Dunnett's post hoc analysis for multiple comparisons.

(B) pBMDMs were infected with the indicated *Salmonella* strains for 17 h and treated with DMSO or 5  $\mu$ M CHIR99021 1 h after uptake. Cell lysates were analyzed by immunoblotting with antibodies against active STAT3 (pY705), STAT3, DnaK for a *Salmonella* infection control, or tubulin (Tub) as a loading control. Data represent the findings of three independent experiments. pE, empty vector.

(C) Percentage of IL-4R $\alpha$ <sup>+</sup> pBMDMs in non-infected (ni), bystander (byst), or infected (infct) cells with a restricted growth gate (Figure S3D) 17 h after uptake of WT or *steE* mutant *Salmonella* carrying the fluorescent plasmid pFCcGi. Where indicated, cells were treated with 5  $\mu$ M CHIR99021 1 h after uptake. Data represent mean and SEM of three independent experiments (two-way ANOVA with Tukey's multiple-comparison test, \*\*\*p < 0.001, \*\*\*\*p < 0.0001; ns, not significant).

(D) WT or CRISPR/Cas9-generated GSK3 $\alpha$ <sup>-/-</sup>, GSK3 $\beta$ <sup>-/-</sup>, or GSK3 $\alpha/\beta$ <sup>-/-</sup> 293ET cells were infected with the indicated *Salmonella* strains for 17 h before whole-cell lysates were immunoblotted with the indicated antibodies. The # indicates the clone used, and pE denotes empty vector. Data are representative of three independent experiments.

(E) GFP or GFP-SteE was expressed in either WT 293ET cells or the indicated GSK3 knockout cell lines, and cell lysates were immunoblotted with the indicated antibodies. Immunoblots are representative of three independent experiments.

(F) GFP or GFP-SteE was co-expressed with the indicated FLAG-tagged GSK3 active or inactive variants in either WT 293ET cells or GSK3 $\alpha/\beta$ <sup>-/-</sup> 293ET cells. Cell lysates were then analyzed by immunoblot for the activation of STAT3. Data are representative of three independent experiments.

(red arrows in Figures S2B and S4A) and transfected GFP-SteE migrated as a doublet in cells expressing active GSK3 $\alpha$  or GSK3 $\beta$  (Figure 2D). Together, these findings imply a post-translational SteE modification that would be consistent with phosphorylation. To identify the putative phosphorylated amino acids of SteE, we expressed GFP-SteE in WT or GSK3 $\alpha/\beta$ <sup>-/-</sup> 293ET cells (Figure S5B), immunoprecipitated it, and analyzed it by mass spectrometry. The start site of SteE (STM2585) is misannotated (Baek et al., 2017), resulting in an additional 24 amino acids (Figure 4C). We therefore used the shorter SteE version that has a consensus Shine-Dalgarno sequence directly upstream of the AUG codon (Figure S5C), and when this version is HA tagged on

the C terminus, it yields a protein of identical molecular mass to the "long" form of SteE (Figure S5C). Phosphorylation at S76 and S106 was detected in GFP-SteE expressed in either WT or GSK3 $\alpha/\beta$ <sup>-/-</sup> cells, whereas phosphorylation at Y17, T91, S141, and Y143 was detected only in GFP-SteE isolated from WT cells (Figure 4C).

To assess the importance of SteE phosphorylation in STAT3 activation, we muted single S/T residues to alanine, whereas Y143 was mutated to phenylalanine (S76A, T91A, S106A, S141A, and Y143F). All mutants were similarly expressed, and each induced equivalent or better STAT3 luciferase-reporter activation when compared with GFP-SteE (Figure S5D).

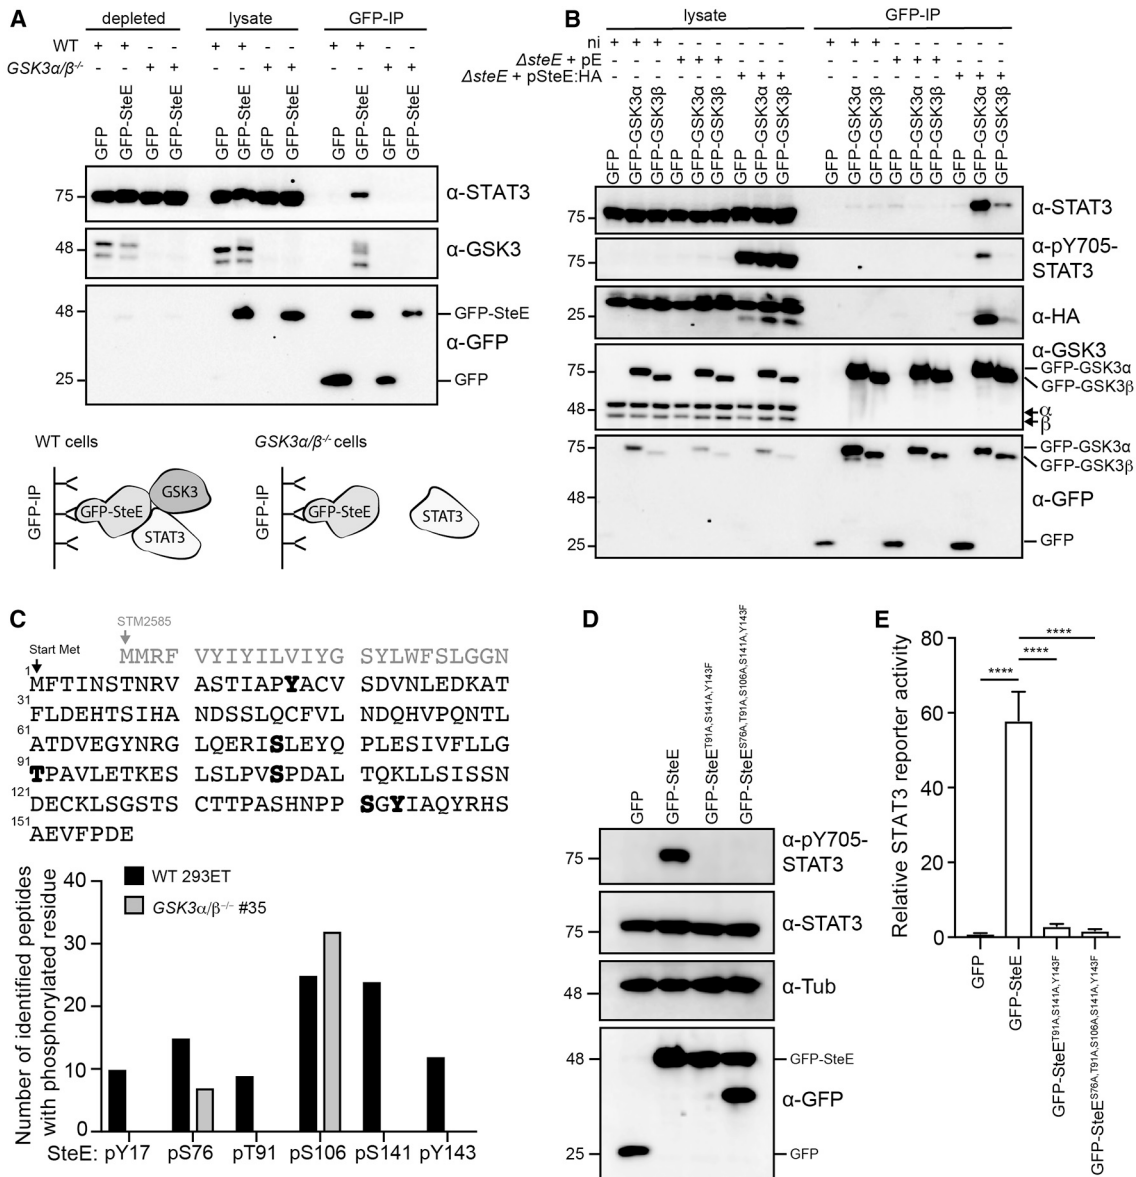

**Figure 4. SteE Enables GSK3 to Form a Complex with STAT3 in which SteE and STAT3 Are Phosphorylated**

(A) WT or GSK3 $\alpha/\beta^{-/-}$  293ET cells expressing GFP or GFP-SteE were lysed, subjected to a GFP immunoprecipitation, and assessed for binding to endogenous STAT3 and GSK3 by immunoblot. Data are representative of three independent repeats.

(B) 293ET cells stably expressing GFP, GFP-GSK3 $\alpha$ , or GFP-GSK3 $\beta$  were left non-infected (ni) or infected with *steE* mutant *Salmonella* carrying either empty plasmid (pE) or pWSK29-SteE:HA. 17 h after uptake, cell lysates were subject to GFP immunoprecipitation (IP) and lysate, and IP samples were analyzed by immunoblotting for HA, endogenous STAT3, activated STAT3 (pY705), endogenous GSK3, and GFP. Data represent the findings of three independent experiments.

(C) The amino acid sequence and numbering of SteE are shown in black. Amino acids identified as phosphorylated are shown in bold. The number of peptides with each phosphorylated residue, as detected by mass spectrometry, is shown for GFP-SteE expressed in either WT or GSK3 $\alpha/\beta^{-/-}$  293ET cells. See Figure S5B for protein expression. The data are obtained from three independent repeats.

(D) Whole-cell lysates from 293ET cells transiently expressing GFP, GFP-SteE, or the indicated GFP-tagged SteE mutants were analyzed by immunoblot with antibodies against STAT3, pY705-STAT3, tubulin (Tub), and GFP. Data are representative of three independent experiments.

(E) Luciferase activity in cell lysates from 293ET cells co-transfected with plasmids encoding a STAT3-dependent *Firefly* luciferase, a constitutively expressed *Renilla* luciferase, and GFP or the indicated GFP-SteE variant. Data are presented as the fold change in STAT3 reporter activity from GFP-expressing cells and represent the mean and SEM of four independent experiments. Statistical significances were calculated from WT GFP-SteE. \*\*\*\* $p < 0.0001$ , one-way ANOVA with Dunnett's post hoc analysis for multiple comparisons.



However, GFP-SteE<sup>T91A/S141A/Y143F</sup>, mutated at three of the putative GSK3 phosphorylation sites, was unable to induce Y705-STAT3 phosphorylation (Figure 4D), did not activate the STAT3 luciferase reporter (Figure 4E), and was as inactive as GFP-SteE<sup>S76A/T91A/S106A/S141A/Y143F</sup> (Figures 4D and 4E). Together, our data show that GSK3 is required for the interaction between SteE and STAT3 and that GSK3-dependent phosphorylation of SteE is critical for SteE-induced STAT3 activation.

### SteE Converts GSK3 to a Tyrosine Kinase with Substrate Specificity for STAT3

Because GSK3 $\alpha$  and GSK3 $\beta$  are S/T kinases and STAT3 becomes phosphorylated on Y705, we first hypothesized that a tyrosine kinase is required. To test this, we screened an array of tyrosine-kinase inhibitors during infection of cells with *steE*-mutant *Salmonella* expressing SteE:HA and monitored STAT3 phosphorylation. Only the addition of the GSK3 inhibitor CHIR99021 suppressed STAT3 phosphorylation (Figure S6A). Canonical cytokine-mediated STAT3 phosphorylation is mediated by JAK proteins (Darnell et al., 1994). However, because STAT3 phosphorylation by *Salmonella* is independent of IL-6 and IL-10 (Lin and Bost, 2004), it was not surprising that the addition of the JAK inhibitors tofacatinib and cerdulatinib did not prevent *Salmonella*-induced STAT3 phosphorylation (Figure S6A). These data suggest that STAT3 becomes phosphorylated by a non-canonical mechanism.

Next, we tested whether SteE promotes the recruitment of additional proteins required for STAT3 phosphorylation to the GSK3 complex. To this end, His-MBP-SteE $\Delta$ N20, or His-MBP as a negative control, was expressed in *E. coli* and purified (Figure S6B). We removed the first 20 amino acids, which are not required for function (Figure S6C), to improve solubility. GFP-GSK3 $\alpha$  or GFP-GSK3 $\beta$ , immunoprecipitated from non-infected 293ET cells, resulted in STAT3 Y705 phosphorylation only when recombinant His-MBP-SteE $\Delta$ N20 and ATP were added but not when His-MBP was added (Figure S6D). Notably, His-MBP-SteE $\Delta$ N20 and STAT3 in the GFP sample did not yield STAT3 phosphorylation, highlighting the essential role of GSK3 in this process. The finding that recombinant SteE can replace infection- or transfection-delivered SteE shows that the proteins required for STAT3 phosphorylation are already present in the GSK3 complex.

Despite exhibiting only serine and threonine kinase activity toward exogenous substrates, GSK3 displays tyrosine-directed auto-phosphorylation, which results in phosphorylation of Y279 (GSK3 $\alpha$ ) and Y216 (GSK3 $\beta$ ) (Cole et al., 2004). We therefore hypothesized that GSK3, when complexed to SteE, directly phosphorylates STAT3 on Y705. We expressed His-GSK3 $\beta$  in insect cells, purified the protein, and carried out *in vitro* kinase assays in the presence of recombinant His-MBP-SteE $\Delta$ N20. Using Pro-Q Diamond phosphoprotein gel stain, we detected phosphorylation of His-MBP-SteE $\Delta$ N20 but not of His-MBP in the GSK3 $\beta$  + ATP sample, providing strong evidence that SteE is a direct substrate of GSK3 (Figure 5A). Analysis of STAT3 activation revealed that Y705-phosphorylated STAT3 was detected only when recombinant His-GSK3 $\beta$ , His-MBP-SteE $\Delta$ N20, and GST-STAT3 were incubated in the presence of ATP (Figure 5A). Mass spectrometry confirmed that in the presence of recombinant GSK3 $\beta$  and SteE, STAT3 became phosphorylated on Y705 (Figure S6E). The percentage of detected phosphorylated

to non-phosphorylated peptides was analyzed for peptides containing the phosphorylated STAT3 residues Y705 or S727. Whereas the addition of GSK3 $\beta$  to the His-MBP-SteE $\Delta$ N20 + GST-STAT3 sample did not alter the percentage of phosphorylated S727-STAT3 peptides, it significantly increased the percentage of pY705 peptides from 17% to 56% (Figure S6F). Because GSK3 purified with two different affinity tags (GFP and His) from two different cell types (human and insect) can still result in STAT3 phosphorylation upon the addition of SteE, it strongly suggests that the GSK3-SteE complex phosphorylates STAT3 at Y705.

To establish whether GSK3 is directly responsible for catalyzing the hydrolysis of the donating ATP in the context of SteE-mediated STAT3 phosphorylation, we mutated the ATP-binding pocket of GSK3 $\alpha$  to accommodate a larger ATP analog (Hertz et al., 2010). The structurally conserved bulky leucine at the “gatekeeper” position in the kinase active site was mutated to a glycine (Chen et al., 2017). GSK3 $\alpha$ <sup>L195G</sup> phosphorylated STAT3 less efficiently than WT GSK3 $\alpha$  when incubated with ATP (Figure 5B), which is consistent with a previous report (Chen et al., 2017). Importantly, GSK3 $\alpha$ <sup>L195G</sup> was able to use the bulky N6-PhEt-ATP, and STAT3 became phosphorylated at Y705, which we detected with the anti-pY705-STAT3 antibody. In contrast, WT GSK3 showed very poor STAT3 Y705 phosphorylation when incubated with the ATP analog (Figure 5B). This shows that GSK3 $\alpha$  hydrolyses the phosphate group from ATP, providing strong evidence that GSK3 is the kinase responsible for STAT3 phosphorylation. To test whether STAT3 receives this phosphate, we replaced the bulky ATP analog with a bulky synthetic N6-PhEt-ATP- $\gamma$ S analog to thiophosphorylate the protein substrates of GSK3. Alkylation of thiophosphorylated substrates generates a bio-orthogonal thiophosphate ester tag that can be detected by immunoblotting with a thiophosphate ester specific antibody. *In vitro* kinase assays with GFP-GSK3 $\alpha$ <sup>L195G</sup> led the anti-thiophosphate ester antibody to detect three proteins, corresponding in molecular mass to His-MBP-SteE $\Delta$ N20 (63 kDa), GFP-GSK3 $\alpha$ <sup>L195G</sup> (75 kDa), and GST-STAT3 (120 kDa) (Figure 5C). In the absence of His-MBP-SteE $\Delta$ N20, only a faint band was detected at the molecular mass corresponding to GST-STAT3. The increase in intensity upon the addition of His-MBP-SteE $\Delta$ N20 demonstrates that SteE facilitates GSK3 $\alpha$ <sup>L195G</sup>-mediated phosphorylation of STAT3. Phosphorylation of GST-STAT3 was not detected in the GFP-GSK3 $\alpha$  sample, even in the presence of SteE, providing unequivocal evidence that GSK3 is the kinase responsible for ATP hydrolysis and STAT3 phosphorylation (Figure 5C).

We conclude that in the presence of SteE, the substrate and amino acid specificity of GSK3 is altered. SteE is phosphorylated by GSK3 on several residues, and this is required for SteE function. GSK3-mediated phosphorylation of SteE then permits the interaction with and phosphorylation of the non-canonical substrate STAT3 on Y705. Overall, the action of SteE culminates in an anti-inflammatory immune response within the infected cell (Figure 6).

## DISCUSSION

Protein phosphorylation is a widespread reversible post-translational modification that regulates signal transduction. Here, we



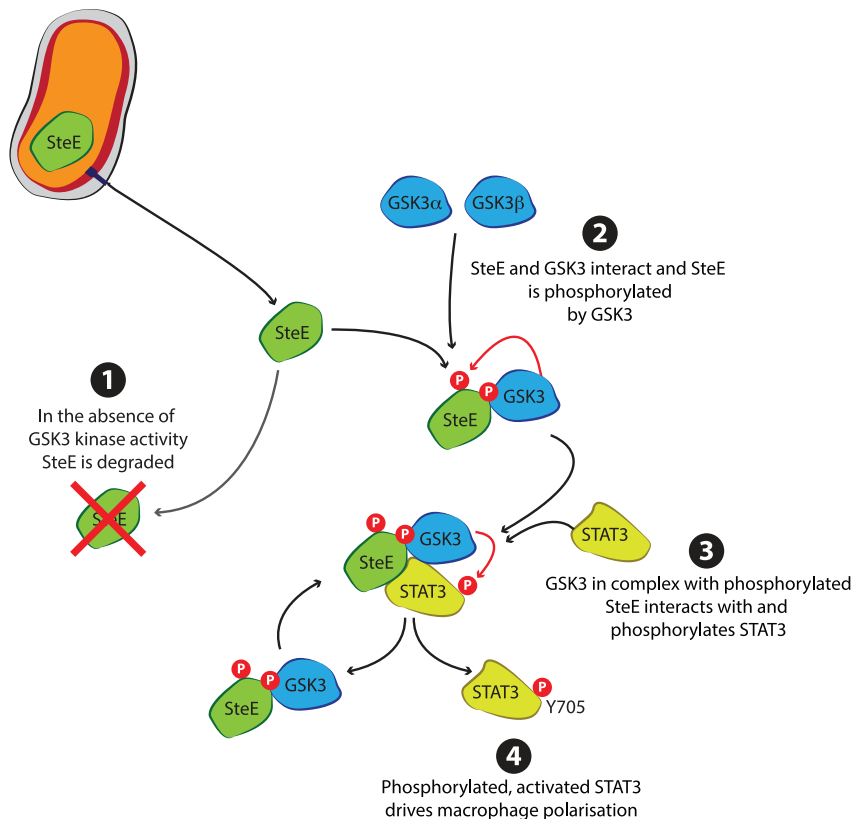

**Figure 6. Model of SteE Action**

After translocation, SteE interacts with and is phosphorylated by GSK3. GSK3 in complex with phosphorylated SteE then interacts with and phosphorylates STAT3 on Y705. Activated STAT3 drives macrophage polarization.

sequence could help mediate an interaction between GSK3 and SteE.

Together, our findings support a model in which GSK3 interacts with and phosphorylates SteE. This prevents the degradation of translocated SteE and promotes the formation of the SteE-GSK3-STAT3 complex. Within this complex, phosphorylated SteE then licenses GSK3 to phosphorylate the non-canonical substrate STAT3 on Y705 (Figure 6). Information on the conformational changes that GSK3 undergoes when bound by SteE awaits the molecular and structural determination of a SteE-GSK3-STAT3 complex. Whether the GSK3-SteE complex has other targets and whether this involves phosphorylation of tyrosine residues should now be explored.

The canonical substrates and functions of GSK3 are vast; more than 50 substrates have been reported, and GSK3 functions

in regulating glucose homeostasis, cell proliferation, apoptosis, and cytokine signaling (Beurel et al., 2015; Cormier and Woodgett, 2017). Because only a fraction of GSK3 is bound by SteE, it is unlikely that its canonical functions involving S/T phosphorylation are perturbed. Whereas STAT3 is not described as a direct substrate, inhibition of GSK3 $\beta$  after stimulation with IFN- $\gamma$ , IL-6, or IFN- $\alpha$  reduces the phosphorylation of STAT3 on Y705 (Beurel and Jope, 2008), and GSK3 $\beta$  modifies STAT3 phosphorylation in esophageal squamous cell carcinoma (Gao et al., 2017). During cytokine stimulation, GSK3 $\beta$  might promote an interaction between STAT3 and membrane tyrosine kinases. However, the possibility that a host chaperone-mediated switch in GSK3 substrate and amino acid specificity occurs, and whether this represents a broader mechanism in the regulation of this constitutively active kinase, deserves investigation.

Physiologically, *Salmonella*-induced STAT3 activation is reported to create a vacuole that is more permissive for *Salmonella* replication (Hannemann et al., 2013), and *steE* mutant bacteria have a severe replication defect *in vivo* (Lawley et al., 2006; Niemann et al., 2011). In addition, a new study in this issue reveals that SteE-mediated polarization of granuloma macrophages promotes persistence (Pham et al., 2019). The altered metabolic state of M2 macrophages might also support the persistence of intracellular pathogens, which in the case of *Salmonella* appears dependent on the host transcription factor PPAR $\delta$  (Eisele et al., 2013; Xavier et al., 2013). Indeed, several other pathogens, including *Mycobacterium tuberculosis* (Huang et al., 2018; Sahu et al., 2017), *Coxiella* (Benoit et al., 2008), *Francisella* (Shirey et al., 2008), and *Brucella* (Kerrinnes et al., 2018), drive

an anti-inflammatory M2-like host response. Whereas GRA18 from *Toxoplasma gondii* interacts with GSK3 and promotes transcription of anti-inflammatory genes, the mechanism is likely to be different because GRA18 functions in a  $\beta$ -catenin-dependent fashion (He et al., 2018). Overall, these findings suggest that there has been evolutionary pressure for intracellular pathogens to drive a more permissive and anti-inflammatory environment. In the case of *Salmonella* infection, macrophage polarization requires the concerted action of effectors that dampen pro-inflammatory signals and SteE-mediated anti-inflammatory activities (Stapels et al., 2018). This probably explains why SteE-mediated IL-10 production (Jaslow et al., 2018) is not sufficient to drive bystander cells into an M2-like state. Finally, the exploitation of GSK3 by SteE, as compared with driving STAT3 activation via canonical signaling, most likely renders SteE-mediated STAT3 activation recalcitrant to negative regulation by SOCS (suppressor of cytokine signaling) proteins, which inhibit JAK proteins (Crocker et al., 2008).

In conclusion, our findings reveal a tightly regulated mechanism where a host S/T kinase is exploited to first phosphorylate and activate the virulence factor and then drive the host kinase to phosphorylate a non-canonical substrate on a tyrosine residue. Effector proteins have been previously described to carry out conventional eukaryotic post-translational modifications, to exhibit new enzymatic activities that result in irreversible and novel post-translational modifications (for example, arginine-GlcNAcylation), and to co-opt host enzymes. Our work described here provides another and more sophisticated effector mechanism: a protein that alters the amino acid and substrate specificity of a host kinase.

## STAR★METHODS

Detailed methods are provided in the online version of this paper and include the following:

- KEY RESOURCES TABLE
- LEAD CONTACT AND MATERIALS AVAILABILITY
- EXPERIMENTAL MODELS AND SUBJECT DETAILS
  - Cell Culture
  - Animal Strains and Infection Conditions
  - Mouse Ethics Statement
- METHODS DETAILS
  - Analysis of Splenic Mononuclear Phagocytes
  - DNA Plasmids
  - DNA and RNA Transfections
  - Flow Cytometry
  - Fluorescence-Activated Cell Sorting
  - Generation of CrispR/Cas9 Knockout Cell Lines
  - Immunoprecipitation
  - Kinase Assays
  - Microscopy
  - Protein Purification
  - *Salmonella* Infection
  - *Salmonella* In Vitro Expression Assay
  - SDS-PAGE and Immunoblotting
  - STAT3 Luciferase Reporter Assay
- QUANTIFICATION AND STATISTICAL ANALYSIS
- DATA AND CODE AVAILABILITY

## SUPPLEMENTAL INFORMATION

Supplemental Information can be found online at <https://doi.org/10.1016/j.chom.2019.11.002>.

## ACKNOWLEDGMENTS

We thank members from the Holden, Helaine, and Thurston laboratories for sharing protocols and scientific discussion; Jessica Rowley for FACS sorting (CMBI); Izabela Glegola-Madejska for support with animal work (CMBI); Felix Randow and David Holden for reagents; and Katrin Rittinger, Philip Cohen, Felix Randow, Avinash Shenoy, and David Holden for valuable comments and reading of the manuscript. Research reported in this publication was supported by a BBSRC David Phillips Fellowship (BB/R011834/1) to T.L.M.T., an MRC DTP Studentship (MR/N014103/1) to I.P., an MRC Career Development Award (MR/M009629/1) and Lister Institute Research Prize to S.H., an EMBO long-term fellowship (ALTF 441-2015) to D.A.C.S., a Paediatric Infectious Diseases Society Fellowship Award funded by Stanley A. Plotkin Sanofi Pasteur and the Child Health Research Institute, Stanford CTSA UL1 TR001085 to T.P., and NIAID grant R01-AI116059 to D.M.M.

## AUTHOR CONTRIBUTIONS

Conceptualization: T.L.M.T., I.P., and E.J.; Investigation: I.P., E.J., J.Z., R.A.G., C.D.S., H.M., E.K., D.A.C.S., N.Z.S., T.H.M.P., S.M.B., S.Y.Q.O., and T.L.M.T.; Writing – Original Draft: I.P., E.J., and T.L.M.T.; Writing – revisions: I.P. and T.L.M.T.; Supervision: D.M.M., S.H., and T.L.M.T.; Funding acquisition: T.L.M.T.

## DECLARATION OF INTERESTS

The authors declare no competing interests.

Received: July 23, 2019

Revised: September 13, 2019

Accepted: November 6, 2019

Published: December 17, 2019

## REFERENCES

- Baek, J., Lee, J., Yoon, K., and Lee, H. (2017). Identification of Unannotated Small Genes in *Salmonella*. *G3 (Bethesda)* 7, 983–989.
- Benoit, M., Barbat, B., Bernard, A., Olive, D., and Mege, J.L. (2008). *Coxiella burnetii*, the agent of Q fever, stimulates an atypical M2 activation program in human macrophages. *Eur. J. Immunol.* 38, 1065–1070.
- Beurel, E., and Jope, R.S. (2008). Differential regulation of STAT family members by glycogen synthase kinase-3. *J. Biol. Chem.* 283, 21934–21944.
- Beurel, E., Grieco, S.F., and Jope, R.S. (2015). Glycogen synthase kinase-3 (GSK3): regulation, actions, and diseases. *Pharmacol. Ther.* 148, 114–131.
- Chen, X., Wang, R., Liu, X., Wu, Y., Zhou, T., Yang, Y., Perez, A., Chen, Y.C., Hu, L., Chadarevian, J.P., et al. (2017). A Chemical-Genetic Approach Reveals the Distinct Roles of GSK3 $\alpha$  and GSK3 $\beta$  in Regulating Embryonic Stem Cell Fate. *Dev. Cell* 43, 563–576.e4.
- Cherepanov, P. (2007). LEDGF/p75 interacts with divergent lentiviral integrases and modulates their enzymatic activity in vitro. *Nucleic Acids Res.* 35, 113–124.
- Cole, A., Frame, S., and Cohen, P. (2004). Further evidence that the tyrosine phosphorylation of glycogen synthase kinase-3 (GSK3) in mammalian cells is an autophosphorylation event. *Biochem. J.* 377, 249–255.
- Cong, L., Ran, F.A., Cox, D., Lin, S., Barretto, R., Habib, N., Hsu, P.D., Wu, X., Jiang, W., Marraffini, L.A., and Zhang, F. (2013). Multiplex genome engineering using CRISPR/Cas systems. *Science* 339, 819–823.
- Cormier, K.W., and Woodgett, J.R. (2017). Recent advances in understanding the cellular roles of GSK-3. *F1000Res.* 6, F1000.
- Crocker, B.A., Kiu, H., and Nicholson, S.E. (2008). SOCS regulation of the JAK/STAT signalling pathway. *Semin. Cell Dev. Biol.* 19, 414–422.

- Darnell, J.E., Jr., Kerr, I.M., and Stark, G.R. (1994). Jak-STAT pathways and transcriptional activation in response to IFNs and other extracellular signaling proteins. *Science* 264, 1415–1421.
- Datsenko, K.A., and Wanner, B.L. (2000). One-step inactivation of chromosomal genes in *Escherichia coli* K-12 using PCR products. *Proc. Natl. Acad. Sci. USA* 97, 6640–6645.
- Eisele, N.A., Ruby, T., Jacobson, A., Manzanillo, P.S., Cox, J.S., Lam, L., Mukundan, L., Chawla, A., and Monack, D.M. (2013). Salmonella require the fatty acid regulator PPAR $\delta$  for the establishment of a metabolic environment essential for long-term persistence. *Cell Host Microbe* 14, 171–182.
- Figueira, R., Watson, K.G., Holden, D.W., and Helaine, S. (2013). Identification of salmonella pathogenicity island-2 type III secretion system effectors involved in intramacrophage replication of *S. enterica* serovar typhimurium: implications for rational vaccine design. *MBio* 4, e00065.
- Gao, S., Li, S., Duan, X., Gu, Z., Ma, Z., Yuan, X., Feng, X., and Wang, H. (2017). Inhibition of glycogen synthase kinase 3 beta (GSK3 $\beta$ ) suppresses the progression of esophageal squamous cell carcinoma by modifying STAT3 activity. *Mol. Carcinog.* 56, 2301–2316.
- Gibbs, K., Washington, E.J., Jaslow, S.L., Bourgeois, J.S., Foster, M.W., Guo, R., Brennan, R.G., and Ko, D.C. (2019). The Salmonella Secreted Effector SarA/SteE Mimics Cytokine Receptor Signaling to Activate STAT3. *Cell Host Microbe*. Published online August 9, 2019. <https://doi.org/10.2139/ssrn.3434723>.
- Gunster, R.A., Matthews, S.A., Holden, D.W., and Thurston, T.L.M. (2017). SseK1 and SseK3 Type III Secretion System Effectors Inhibit NF- $\kappa$ B Signaling and Necroptotic Cell Death in Salmonella-Infected Macrophages. *Infect. Immun.* 23, 85.
- Hannemann, S., Gao, B., and Galán, J.E. (2013). Salmonella modulation of host cell gene expression promotes its intracellular growth. *PLoS Pathog.* 9, e1003668.
- Haraga, A., and Miller, S.I. (2003). A Salmonella enterica serovar typhimurium translocated leucine-rich repeat effector protein inhibits NF- $\kappa$ B-dependent gene expression. *Infect. Immun.* 71, 4052–4058.
- He, H., Brenier-Pinchart, M.P., Braun, L., Kraut, A., Touquet, B., Couté, Y., Tardieux, I., Hakimi, M.A., and Bougourd, A. (2018). Characterization of a *Toxoplasma* effector uncovers an alternative GSK3 $\beta$ -catenin-regulatory pathway of inflammation. *eLife* 7, e39887.
- Hertz, N.T., Wang, B.T., Allen, J.J., Zhang, C., Dar, A.C., Burlingame, A.L., and Shokat, K.M. (2010). Chemical genetic approach for kinase-substrate mapping by covalent capture of thiophosphopeptides and analysis by mass spectrometry. *Curr. Protoc. Chem. Biol.* 2, 15–36.
- Huang, L., Nazarova, E.V., Tan, S., Liu, Y., and Russell, D.G. (2018). Growth of *Mycobacterium tuberculosis* in vivo segregates with host macrophage metabolism and ontogeny. *J. Exp. Med.* 215, 1135–1152.
- Jacobson, L. (2002). Middle-aged C57BL/6 mice have impaired responses to leptin that are not improved by calorie restriction. *Am. J. Physiol. Endocrinol. Metab.* 282, E786–E793.
- Jaslow, S.L., Gibbs, K.D., Fricke, W.F., Wang, L., Pittman, K.J., Mammel, M.K., Thaden, J.T., Fowler, V.G., Jr., Hammer, G.E., Eifenbein, J.R., and Ko, D.C. (2018). Salmonella Activation of STAT3 Signaling by SarA Effector Promotes Intracellular Replication and Production of IL-10. *Cell Rep.* 23, 3525–3536.
- Jennings, E., Thurston, T.L.M., and Holden, D.W. (2017). Salmonella SPI-2 Type III Secretion System Effectors: Molecular Mechanisms And Physiological Consequences. *Cell Host Microbe* 22, 217–231.
- Jennings, E., Esposito, D., Rittinger, K., and Thurston, T.L.M. (2018). Structure-function analyses of the bacterial zinc metalloprotease effector protein GtgA uncover key residues required for deactivating NF- $\kappa$ B. *J. Biol. Chem.* 293, 15316–15329.
- Kerrinnes, T., Winter, M.G., Young, B.M., Diaz-Ochoa, V.E., Winter, S.E., and Tsolis, R.M. (2018). Utilization of Host Polyamines in Alternatively Activated Macrophages Promotes Chronic Infection by *Brucella abortus*. *Infect. Immun.* 86, e00458.
- Kinstrie, R., Luebbering, N., Miranda-Saavedra, D., Sibbet, G., Han, J., Lochhead, P.A., and Cleghon, V. (2010). Characterization of a domain that transiently converts class 2 DYRKs into intramolecular tyrosine kinases. *Sci. Signal.* 3, ra16.
- Lawley, T.D., Chan, K., Thompson, L.J., Kim, C.C., Govoni, G.R., and Monack, D.M. (2006). Genome-wide screen for Salmonella genes required for long-term systemic infection of the mouse. *PLoS Pathog.* 2, e11.
- Li, S., Zhang, L., Yao, Q., Li, L., Dong, N., Rong, J., Gao, W., Ding, X., Sun, L., Chen, X., et al. (2013). Pathogen blocks host death receptor signalling by arginine GlcNAcylation of death domains. *Nature* 507, 242–246.
- Lin, T., and Bost, K.L. (2004). STAT3 activation in macrophages following infection with Salmonella. *Biochem. Biophys. Res. Commun.* 321, 828–834.
- Lochhead, P.A., Kinstrie, R., Sibbet, G., Rawjee, T., Morrice, N., and Cleghon, V. (2006). A chaperone-dependent GSK3 $\beta$  transitional intermediate mediates activation-loop autophosphorylation. *Mol. Cell* 24, 627–633.
- Martino, L., Holland, L., Christodoulou, E., Kunzelmann, S., Esposito, D., and Rittinger, K. (2016). The Biophysical Characterisation and SAXS Analysis of Human NLRP1 Uncover a New Level of Complexity of NLR Proteins. *PLoS ONE* 11, e0164662.
- Martino, L., Brown, N.R., Masino, L., Esposito, D., and Rittinger, K. (2018). Determinants of E2-ubiquitin conjugate recognition by RBR E3 ligases. *Sci. Rep.* 8, 68.
- Mazurkiewicz, P., Thomas, J., Thompson, J.A., Liu, M., Arbibe, L., Sansonetti, P., and Holden, D.W. (2008). SpvC is a Salmonella effector with phosphothreonine lyase activity on host mitogen-activated protein kinases. *Mol. Microbiol.* 67, 1371–1383.
- McAlpine, C.S., Huang, A., Emdin, A., Banko, N.S., Beriault, D.R., Shi, Y., and Werstuck, G.H. (2015). Deletion of Myeloid GSK3 $\alpha$  Attenuates Atherosclerosis and Promotes an M2 Macrophage Phenotype. *Arterioscler. Thromb. Vasc. Biol.* 35, 1113–1122.
- McCoy, M.W., Moreland, S.M., and Detweiler, C.S. (2012). Hemophagocytic macrophages in murine typhoid fever have an anti-inflammatory phenotype. *Infect. Immun.* 80, 3642–3649.
- Mesquita, F.S., Holden, D.W., and Rolhion, N. (2013). Lack of effect of the Salmonella deubiquitinase SseL on the NF- $\kappa$ B pathway. *PLoS ONE* 8, e53064.
- Niemann, G.S., Brown, R.N., Gustin, J.K., Stufkens, A., Shaikh-Kidwai, A.S., Li, J., McDermott, J.E., Brewer, H.M., Schepmoes, A., Smith, R.D., et al. (2011). Discovery of novel secreted virulence factors from Salmonella enterica serovar Typhimurium by proteomic analysis of culture supernatants. *Infect. Immun.* 79, 33–43.
- Pham, T.H.M., Brewer, S., Thurston, T., Massis, L., Honeycutt, J., Jacobson, A.R., Vilches-Moure, J.G., Lugo, K., Helaine, S., and Monack, D. (2019). Salmonella-Driven Polarization of Granuloma Macrophages Counteracts TNF-Mediated Pathogen Restriction During Persistent Infection. *Cell Host Microbe*. Published online August 3, 2019. <https://doi.org/10.2139/ssrn.3432466>.
- Randow, F., and Sale, J.E. (2006). Retroviral transduction of DT40. *Subcell. Biochem.* 40, 383–386.
- Sahu, S.K., Kumar, M., Chakraborty, S., Banerjee, S.K., Kumar, R., Gupta, P., Jana, K., Gupta, U.D., Ghosh, Z., Kundu, M., and Basu, J. (2017). MicroRNA 26a (miR-26a)/KLF4 and CREB-C/EBP $\beta$  regulate innate immune signaling, the polarization of macrophages and the trafficking of *Mycobacterium tuberculosis* to lysosomes during infection. *PLoS Pathog.* 13, e1006410.
- Saliba, A.E., Li, L., Westermann, A.J., Appenzeller, S., Stapels, D.A., Schulte, L.N., Helaine, S., and Vogel, J. (2016). Single-cell RNA-seq ties macrophage polarization to growth rate of intracellular Salmonella. *Nat. Microbiol.* 2, 16206.
- Schindler, C., and Darnell, J.E., Jr. (1995). Transcriptional responses to polypeptide ligands: the JAK-STAT pathway. *Annu. Rev. Biochem.* 64, 621–651.
- Shapouri-Moghaddam, A., Mohammadian, S., Vazini, H., Taghadosi, M., Esmaili, S.A., Mardani, F., Seifi, B., Mohammadi, A., Afshari, J.T., and Sahebkar, A. (2018). Macrophage plasticity, polarization, and function in health and disease. *J. Cell. Physiol.* 233, 6425–6440.
- Shirey, K.A., Cole, L.E., Keegan, A.D., and Vogel, S.N. (2008). Francisella tularensis live vaccine strain induces macrophage alternative activation as a survival mechanism. *J. Immunol.* 181, 4159–4167.

- Shuai, K., Horvath, C.M., Huang, L.H., Qureshi, S.A., Cowburn, D., and Darnell, J.E., Jr. (1994). Interferon activation of the transcription factor Stat91 involves dimerization through SH2-phosphotyrosyl peptide interactions. *Cell* 76, 821–828.
- Stapels, D.A.C., Hill, P.W.S., Westermann, A.J., Fisher, R.A., Thurston, T.L., Saliba, A.E., Blommestein, I., Vogel, J., and Helaine, S. (2018). *Salmonella* persists undermine host immune defenses during antibiotic treatment. *Science* 362, 1156–1160.
- Sun, H., Kamanova, J., Lara-Tejero, M., and Galán, J.E. (2016). A Family of Salmonella Type III Secretion Effector Proteins Selectively Targets the NF- $\kappa$ B Signaling Pathway to Preserve Host Homeostasis. *PLoS Pathog.* 12, e1005484.
- Walte, A., Rübén, K., Birner-Gruenberger, R., Preisinger, C., Bamberg-Lemper, S., Hilz, N., Bracher, F., and Becker, W. (2013). Mechanism of dual specificity kinase activity of DYRK1A. *FEBS J.* 280, 4495–4511.
- Wang, N., Liang, H., and Zen, K. (2014). Molecular mechanisms that influence the macrophage m1-m2 polarization balance. *Front. Immunol.* 5, 614.
- Xavier, M.N., Winter, M.G., Spees, A.M., den Hartigh, A.B., Nguyen, K., Roux, C.M., Silva, T.M., Atluri, V.L., Kerrinnes, T., Keestra, A.M., et al. (2013). PPAR $\gamma$ -mediated increase in glucose availability sustains chronic *Brucella abortus* infection in alternatively activated macrophages. *Cell Host Microbe* 14, 159–170.

## STAR★METHODS

## KEY RESOURCES TABLE

| REAGENT or RESOURCE                                                                                      | SOURCE                                         | IDENTIFIER                          |
|----------------------------------------------------------------------------------------------------------|------------------------------------------------|-------------------------------------|
| <b>Antibodies</b>                                                                                        |                                                |                                     |
| TruStain FcX™ (anti-mouse CD16/32)                                                                       | BioLegend                                      | Cat#101319; RRID: AB_1574973        |
| Rat anti CD124 (IL-4R $\alpha$ , clone IL4R-M1)                                                          | BD biosciences                                 | Cat#551853;<br>RRID: AB_394274      |
| Goat anti CSA-1                                                                                          | BacTrace                                       | Cat#01-91-99                        |
| Rabbit monoclonal anti pY705-STAT3                                                                       | Cell Signaling                                 | Cat#9145S; RRID: AB_2491009         |
| Rat anti HA (Clone 3F10)                                                                                 | Roche                                          | Cat#11867423001; RRID: AB_390918    |
| Rabbit anti HA (HRP-conjugated)                                                                          | R&D Systems                                    | Cat#HAM0601                         |
| Rabbit anti HA                                                                                           | Sigma                                          | Cat#H6908; RRID: AB_260070          |
| Mouse anti HA.11                                                                                         | BioLegend                                      | Cat#901503                          |
| Rabbit anti GFP                                                                                          | Life Technologies                              | Cat#G10362; RRID: AB_2536526        |
| Mouse anti DnaK                                                                                          | Enzo                                           | Cat#ADI-SPA-880-D; RRID: AB_2039064 |
| Mouse anti Tubulin beta                                                                                  | DSHB                                           | Cat#E7; RRID: AB_528499             |
| Rabbit anti Actin                                                                                        | Sigma                                          | Cat#A2066; RRID: AB_476693          |
| Rabbit anti STAT3                                                                                        | Cell Signaling                                 | Cat#12640S; RRID: AB_2629499        |
| Rabbit anti STAT6                                                                                        | Cell Signaling                                 | Cat#9362S; RRID: AB_2271211         |
| Rabbit anti STAT6 pY641                                                                                  | Cell Signaling                                 | Cat#56554S; RRID: AB_2799514        |
| Rabbit anti His (HRP-conjugated)                                                                         | Abcam                                          | Cat#ab1187; RRID: AB_298652         |
| Rabbit anti GSK3                                                                                         | Cell Signaling                                 | Cat#5676S; RRID: AB_10547140        |
| Rabbit anti FLAG                                                                                         | Sigma                                          | Cat#F7425; RRID: AB_439687          |
| Rabbit anti HSPA1L                                                                                       | Abcam                                          | Cat#ab154409                        |
| Rabbit anti Thiophosphate ester                                                                          | Abcam                                          | Cat#ab92570; RRID: AB_10562142      |
| Goat anti Rabbit                                                                                         | Agilent (Dako)                                 | Cat#P0448; RRID: AB_2617138         |
| Goat anti Mouse                                                                                          | Agilent (Dako)                                 | Cat#P0447;<br>RRID: AB_2617137      |
| <b>Bacterial and Virus Strains</b>                                                                       |                                                |                                     |
| <i>Salmonella enterica</i> serovar Typhimurium, strain 14028s                                            | Gift from David Holden (Jennings et al., 2018) | Proteome ID: UP000002695            |
| <i>steE</i> mutant <i>Salmonella</i> (14028)                                                             | This study                                     | N/A                                 |
| <i>sseL</i> mutant <i>Salmonella</i> (14028)                                                             | Gift from David Holden (Mesquita et al., 2013) | N/A                                 |
| <i>Salmonella enterica</i> serovar Typhimurium, strain SL1344                                            | Gift from David Holden (Stapels et al., 2018)  | N/A                                 |
| <i>steE</i> mutant <i>Salmonella</i> (SL1344)                                                            | This study                                     | N/A                                 |
| WT or <i>steE</i> mutant <i>Salmonella</i> (14028) carrying pFCcGi                                       | Stapels et al., 2018                           | N/A                                 |
| WT or <i>steE</i> mutant <i>Salmonella</i> carrying empty pWSK29 or pWSK29 for HA-tagged-SteE expression | This study                                     | N/A                                 |
| WT <i>Salmonella</i> carrying pWSK29 for HA-tagged-PipB expression                                       | Gift from David Holden                         | N/A                                 |
| <i>sseL</i> mutant <i>Salmonella</i> carrying pWSK29 for HA-tagged-SseL expression                       | Gift from David Holden (Mesquita et al., 2013) | N/A                                 |
| <b>Chemicals, Peptides, and Recombinant Proteins</b>                                                     |                                                |                                     |
| IL-4                                                                                                     | Peprtech                                       | Cat#214-14                          |
| IL-10                                                                                                    | Peprtech                                       | Cat#210-10                          |

(Continued on next page)

**Continued**

| REAGENT or RESOURCE                                    | SOURCE                             | IDENTIFIER                     |
|--------------------------------------------------------|------------------------------------|--------------------------------|
| CHIR-99021                                             | SelleckChem                        | Cat#S2924                      |
| Bosutinib                                              | ApexBio                            | Cat#A2149                      |
| Cerdulatinib                                           | ApexBio                            | Cat#B8023                      |
| Dasatinib                                              | ApexBio                            | Cat#A3017                      |
| Erlotinib Hydrochloride                                | ApexBio                            | Cat#A8234                      |
| Imatinib                                               | ApexBio                            | Cat#B2171                      |
| Midostaurin                                            | ApexBio                            | Cat#B3709                      |
| PF-431396                                              | ApexBio                            | Cat#A8692                      |
| PRT062607                                              | ApexBio                            | Cat#A3736                      |
| Saracatinib                                            | ApexBio                            | Cat#A2133                      |
| Tofacitinib                                            | ApexBio                            | Cat#A4135                      |
| ATP                                                    | ThermoFisher                       | Cat#R0441                      |
| 6-PhEt-ATP                                             | BioLog, Life Science Institute     | Cat#P012; CAS#181705-62-4      |
| 6-PhEt-ATP- $\gamma$ S                                 | BioLog, Life Science Institute     | Cat#P026; CAS#944834-43-9      |
| p-Nitrobenzyl mesylate (PNBM)                          | Abcam                              | Cat#ab138910                   |
| Lipofectamine 2000                                     | Life Technologies                  | Cat#11668019                   |
| GenMute                                                | Signagen                           | Cat#SL100568-PMG               |
| Mouse serum                                            | Sigma                              | Cat#S7273                      |
| GFP-TRAP                                               | Pierce                             | Cat#gta-100                    |
| Pierce Anti-HA Agarose                                 | ThermoFisher                       | Cat#26181                      |
| PhosSTOP™                                              | Roche                              | Cat#4906837001                 |
| cOmplete™, Mini, EDTA-free Protease Inhibitor Cocktail | Roche                              | Cat#4693159001                 |
| HisPur™ Ni-NTA resin                                   | ThermoFisher                       | Cat#88222                      |
| Recombinant Human His-GSK3 $\beta$                     | This study                         | N/A                            |
| Recombinant His-MBP                                    | This study                         | N/A                            |
| Recombinant His-MBP-SteE $\Delta$ N20                  | This study                         | N/A                            |
| Recombinant Human His-STAT3                            | This study                         | N/A                            |
| Recombinant Human GST-STAT3                            | Abcam                              | Cat#ab43618                    |
| <b>Critical Commercial Assays</b>                      |                                    |                                |
| Pro-Q® Diamond Phosphoprotein Gel Stain                | Invitrogen                         | Cat#P33300                     |
| Dual-luciferase reporter assay system                  | Promega                            | Cat#E1980                      |
| Signal STAT3 Reporter (luc) Kit                        | QIAGEN                             | Cat#CCS-9028L                  |
| Mouse macrophage nucleofector kit                      | Lonza                              | Cat#VPA-1009                   |
| LIVE/DEAD Fixable Blue stain                           | Invitrogen                         | Cat#L34961                     |
| <b>Experimental Models: Cell Lines</b>                 |                                    |                                |
| 293ET                                                  | Gift from Felix Randow             | RRID: CVCL_6996                |
| HeLa                                                   | American Tissue Culture Collection | RRID: CVCL_0030                |
| GSK3 $\alpha$ <sup>-/-</sup> 293ET cells               | This study                         | N/A                            |
| GSK3 $\beta$ <sup>-/-</sup> 293ET cells                | This study                         | N/A                            |
| GSK3 $\alpha\beta$ <sup>-/-</sup> 293ET cells          | This study                         | N/A                            |
| <b>Experimental Models: Organisms/Strains</b>          |                                    |                                |
| C57BL/6 <i>Nramp</i> <sup>+/+</sup> mice               | In house colony                    | <a href="#">Jacobson, 2002</a> |
| C57BL/6 mice for bone marrow derived macrophages       | Charles River                      | N/A                            |
| <i>E. coli</i> BL21                                    | <a href="#">Cherepanov, 2007</a>   | N/A                            |
| Sf9 insect cells                                       | ThermoFisher                       | Cat#11496015                   |

(Continued on next page)



**Continued**

| REAGENT or RESOURCE                                  | SOURCE                                                              | IDENTIFIER                                                                                                                                                |
|------------------------------------------------------|---------------------------------------------------------------------|-----------------------------------------------------------------------------------------------------------------------------------------------------------|
| Oligonucleotides                                     |                                                                     |                                                                                                                                                           |
| Primer sequences                                     | See <a href="#">Table S1</a>                                        | N/A                                                                                                                                                       |
| guideRNA to target GSK3 $\alpha$ GCTGCCGCCGGTCCACCCC | This study                                                          | N/A                                                                                                                                                       |
| guideRNA to target GSK3 $\beta$ GTCCTGCAATACTTTCTTGA | This study                                                          | N/A                                                                                                                                                       |
| ON-TARGETplus STAT3 siRNA                            | Dharmacon                                                           | Cat#L-040794-01-0005                                                                                                                                      |
| Non-targeting control siRNA                          | Dharmacon                                                           | Cat#D-001810-01-05                                                                                                                                        |
| Recombinant DNA                                      |                                                                     |                                                                                                                                                           |
| pX330                                                | <a href="#">Cong et al., 2013</a>                                   | RRID: Addgene_42230                                                                                                                                       |
| M5p and related plasmids                             | Gift from Felix Randow<br>( <a href="#">Randow and Sale, 2006</a> ) | N/A                                                                                                                                                       |
| pTCMV                                                | <a href="#">Jennings et al., 2017</a>                               | N/A                                                                                                                                                       |
| pET49                                                | <a href="#">Martino et al., 2018</a>                                | N/A                                                                                                                                                       |
| pACEBac                                              | Gift from Katrin Rittinger                                          | N/A                                                                                                                                                       |
| Software and Algorithms                              |                                                                     |                                                                                                                                                           |
| Prism                                                | GraphPad Version 8                                                  | <a href="https://www.graphpad.com/scientific-software/prism/">https://www.graphpad.com/scientific-software/prism/</a>                                     |
| Excel                                                | Microsoft                                                           | Version 16.16.5                                                                                                                                           |
| Image Lab                                            | BioRad                                                              | <a href="https://www.bio-rad.com/en-uk/product/image-lab-software?ID=KREGP5E8Z">https://www.bio-rad.com/en-uk/product/image-lab-software?ID=KREGP5E8Z</a> |
| FlowJo                                               | TreeStar                                                            | <a href="https://www.flowjo.com/">https://www.flowjo.com/</a>                                                                                             |

**LEAD CONTACT AND MATERIALS AVAILABILITY**

Further information and requests for resources and reagents should be directed to and will be fulfilled by the Lead Contact, Teresa L.M. Thurston ([t.thurston@imperial.ac.uk](mailto:t.thurston@imperial.ac.uk)).

**EXPERIMENTAL MODELS AND SUBJECT DETAILS****Cell Culture**

HEK293ET cells and HeLa cells (Gifts from Felix Randow, MRC-LMB) were maintained in Dulbecco's modified eagle medium (DMEM; Sigma) supplemented with 10% heat-inactivated fetal calf serum (FCS; GIBCO, Life Technologies) at 37°C in 5% CO<sub>2</sub>.

Primary bone-marrow-derived macrophages (pBMDMs) were prepared from the tibia and femur of 6 to 8-week old female C57BL/6 mice (Charles River), in accordance with a UK Home Office Project License in a Home Office designated facility. Red blood cells were lysed in 0.83% NH<sub>4</sub>Cl for 3 min, and then the remaining progenitor cells were cultured in DMEM containing 20% L929 culture supernatant (LCM), 10% FCS, 10 mM HEPES (Sigma), 1 mM sodium pyruvate (Sigma), 0.05 mM beta-mercaptoethanol (Sigma), 100 U/mL penicillin (Sigma) and 100  $\mu$ g/mL streptomycin (Sigma) at 37°C in 5% CO<sub>2</sub>. After three days, fresh medium was added and the differentiated pBMDMs were harvested at day seven and seeded without LCM or antibiotics in tissue culture treated 6-well or 10 cm dishes.

**Animal Strains and Infection Conditions**

C57BL/6 *Nramp*<sup>+/+</sup> mice were derived as described previously and obtained from an in-house colony ([Jacobson, 2002](#)). Female and male mice 6-12 weeks old were infected with either 10<sup>3</sup> CFU WT SL1344 or  $\Delta$ *steE* SL1344 in 200  $\mu$ L sterile PBS via intraperitoneal inoculation and analyzed at 10 days post-infection. Organs were collected, weighted, and either homogenized in PBS for CFU enumeration or used to make single cell suspensions for flow cytometric analysis.

**Mouse Ethics Statement**

Animal experiments were performed in accordance with NIH guidelines, the Animal Welfare Act, and US federal law and approved by the Stanford University Administrative Panel on Laboratory Animal Care (APLAC) and overseen by the Institutional Animal Care and Use Committee (IACUC) under Protocol ID 12826. Prior to experimentation, mice were given at least one week to acclimatise to the Stanford Animal Biohazard Research Facility.

## METHODS DETAILS

### Analysis of Splenic Mononuclear Phagocytes

Splenic single-cell suspensions were incubated in Fc Block (TruStain fcX anti-mouse CD16/32, Biolegend) for 15 min on ice and washed with PBS. Cells were stained on ice for 25 min in PBS with a cocktail of Live/Dead Fixable Blue Viability Dye (Invitrogen) and antibodies for surface antigens. Cells were washed with FACS buffer (PBS containing 2% FBS and 2 mM EDTA), followed by fixation for 15 min with Cytotfix/Cytoperm solution (BD Biosciences). Cells were washed twice with Perm/Wash buffer (BD Biosciences) and stained for intracellular *Salmonella* using CSA-1 antibody (KPL). After washing, cells were resuspended in FACS buffer and analyzed on a LSRFortessa cytometer (Becton Dickinson). Data were acquired with DIVA software (BD Biosciences) and analyzed using FlowJo software (TreeStar). Splenocytes were gated for live, singlet, CD19<sup>+</sup>CD3<sup>-</sup>NK1.1<sup>-</sup> cells and then further gated to select CD11b<sup>+</sup>MHCII<sup>+</sup>F4/80<sup>+</sup>, Ly6G-negative mononuclear phagocytes. Intracellular staining with anti-*Salmonella* FITC antibody was used to identify infected from non-infected cells. IL-4R $\alpha$  levels were measured as the median fluorescent intensity.

### DNA Plasmids

M5P or closely related plasmids (gift from Dr Randow, MRC-LMB) were used for both transient transfection and for transduction with recombinant MLV to produce stable expression of proteins in mammalian cells (Randow and Sale, 2006). Alternatively, 200–400 ng of pTCMV-GFP-[gene] plasmids were used per 24 well for transient expression in 293ET cells. Open reading frames encoding human GSK3 $\alpha$  (UniProt: P49840) and GSK3 $\beta$  (UniProt: P49841) were amplified by PCR from 293ET cDNA. During the course of our studies we noted that the start methionine for SteE is differentially annotated on uniprot depending on the *Salmonella* strain. Based on *in silico* analysis of the Shine-Dalgarno sequence, predicted translation initiation rates and experimental analysis of the protein by immunoblot, this study uses a sequence corresponding to amino acids 25 to 181 from the annotated version of SteE (STM2585, UniProt: Q8ZN17). This corresponds to the start methionine in the annotated versions of SteE with UniProt: A0A455RQ54, A0A484YIU7, A0A0U1H469 and A0A447N637. This sequence was amplified from *Salmonella* genomic DNA (strain 14028s) and represents the wild-type form of SteE used in this paper (Figure 4C). Any truncations or point mutations were introduced by PCR-mediated mutagenesis. pET49-His-MBP-SteE $\Delta$ N20 (vector source (Martino et al., 2018)) was used for protein expression in BL21 *E. coli* and pACEBac-His-GSK3 $\beta$  and pACEBac-His-STAT3 expression vectors (vectors were a gift from Dr Katrin Rittinger) were used for the generation of recombinant human GSK3 $\beta$  and STAT3 (UniProt: P40763) from SF9 insect cells.

### DNA and RNA Transfections

Plasmid DNA was transfected using Lipofectamine 2000 (Life Technologies) as per the manufacturer's instructions. ON-TARGETplus STAT3 siRNA (Dharmacon, L-040794-01-0005) or ON-TARGETplus non-targeting control siRNA (Dharmacon, D-001810-01-05) was transfected using either GenMute (Signagen) or the mouse macrophage nucleofector kit (Lonza, VPA-1009) according to the manufacturer's instructions using a final siRNA concentration of 50 nM. Cells were infected two days after siRNA treatment.

### Flow Cytometry

Macrophages, infected for 17 h as described above, were fixed for 15 min in 3% PFA/PBS and immunolabelled for extracellular IL-4R $\alpha$  (BD biosciences, clone mL4R-M1) in 10% horse serum / PBS for 30 min before analysis on a BD Fortessa flow cytometer. Gates were set to identify the infected macrophages that contained intracellular bacteria carrying the plasmid pFCcGi, which encodes constitutively expressed mCherry and arabinose-inducible GFP, from the non-infected bystanders. The percentage of IL-4R $\alpha$  macrophages was then determined in each population using FlowJo software.

### Fluorescence-Activated Cell Sorting

pBMDMs, infected for 18 h as described above, were washed twice in PBS before being detached from the plates by scraping in cold PBS. Live cells were then stained for extracellular IL-4R $\alpha$  using a BV405-conjugated antibody (BD biosciences clone mL4R-M1) in 10% horse serum / PBS for 30 min before FACS was used to sort cells under continuous cooling to 4°C on a BD FACS Aria III into three populations: non-infected bystanders, cells containing mCherry and GFP-positive bacteria that were IL-4R $\alpha$  negative and cells containing mCherry and GFP-positive bacteria that were IL-4R $\alpha$  positive. The gating strategy was set to exclude apoptotic macrophages and doublets and only include infected macrophages that had a similar bacterial burden (based on mCherry intensity). The collected cells were then lysed in SDS lysis buffer and analyzed by immunoblotting.

### Generation of CrispR/Cas9 Knockout Cell Lines

293ET cells were transiently transfected with pX330 (Cong et al., 2013) containing a guideRNA to target GSK3 $\alpha$  (GCTGCCGC CGGGTCCACCCC) or GSK3 $\beta$  (GTCCTGCAATACTTCTTGA) or both plasmids to create the double knockout cell line. After 24 h, cells were seeded into 96 well plates at 0.3 cells / well. Single clones were screened by immunoblotting with anti-GSK3 antibody. In addition, the target gene was sequenced to confirm gene-editing.

### Immunoprecipitation

The indicated cells were lysed in lysis buffer (10% glycerol, 20 mM Tris Cl pH 7.4, 150 mM NaCl, 0.1% Triton X-100) supplemented with protease inhibitors (1 mM PMSF, 1 mM benzamide, 1  $\mu$ g/mL aprotinin, 5  $\mu$ g/mL leupeptin) and phosSTOP (Roche) and clarified

by centrifugation at 17,000  $\times g$  for 10 min at 4°C. GFP-TRAP (ChromoTek) or anti-HA beads (ThermoFisher) were equilibrated in cold lysis buffer and incubated with the lysate for at least 2 h at 4°C with rotation. Beads were then washed three times with 1 mL lysis buffer and bound proteins were eluted by the addition of SDS loading buffer. The experiments used to analyze the interaction partners of SteE by mass spectrometry (LC-MS-MS) contained 1 mM DTT in the buffer and phosSTOP was excluded. For the identification of proteins and phosphorylated amino acids by mass spectrometry (LC-MS-MS), beads with bound protein from triplicate experiments were sent for analysis at the Institute of Biochemistry and Biophysics (IBB) at the Polish Academy of Sciences, Warsaw, Poland. Acquired spectra were compared to a protein sequence database (*S. Typhimurium* 14028s, Uniprot; *Homo sapiens*, Swiss-Prot) using the MASCOT search engine.

### Kinase Assays

293ET stably expressing GFP, GFP-GSK3 $\alpha$  and GFP-GSK3 $\beta$  were seeded in T175 flasks and grown to confluency. Alternatively, 293ET cells seeded in a 6-well format, were transiently transfected with 1  $\mu$ g pCMV.GFP or 1  $\mu$ g pCMV.GFP-SteE for 24 h. GFP-tagged proteins were immunoprecipitated on beads as described above, but without performing the elution step. After two washes in kinase buffer (25 mM HEPES pH 7.4, 25 mM MgCl<sub>2</sub>, 1 mM tris[2-carboxyethyl]phosphine [TCEP], 25 mM  $\beta$ -glycerophosphate, 0.1 nM NaVO<sub>3</sub>, 0.5 mM NaF, 100 nM Okadaic Acid), the beads were resuspended in 50  $\mu$ L kinase buffer containing 1 mM ATP (ThermoFisher), 1.6  $\mu$ g His-MBP (this study) or 1.6  $\mu$ g His-MBP-SteE $\Delta$ N20 (this study), 0.4  $\mu$ g GST-STAT3 (Abcam) or 0.4  $\mu$ g His-STAT3 (this study), as indicated. The reactions were carried out at 30°C with agitation at 600 RPM in a PCMT Grant-bio thermomixer for 30 min and stopped by adding 5x SDS loading buffer. Thereafter, the samples were boiled at 95°C for 5 min, centrifuged at 1500  $\times g$  for 1 min and the eluted proteins were subjected to immunoblot analysis.

Alternatively, kinase assays were performed in Kinase Buffer with the following recombinant proteins, 5  $\mu$ g His-GSK3 $\beta$  (this study), 12.5  $\mu$ g His-MBP or His-MBP-SteE $\Delta$ N20 (this study), together with 0.4  $\mu$ g GST-STAT3 (Abcam), with or without 1 mM ATP as indicated. After 30 min the reaction was terminated with the addition of 5x SDS loading buffer. The samples were analyzed by SDS-PAGE and immunoblotting as well as with Pro-Q® Diamond Phosphoprotein Gel Stain as per the manufactures' recommended protocol (Invitrogen). After analysis on a ChemiDoc Imaging System (BioRad) the gel was then stained with Coomassie.

For experiments involving the use of a bulky ATP analog, site directed mutagenesis was used to expand the ATP binding pocket of GSK3 $\alpha$ , by substituting Leucine 195 to Glycine. 293ET cells were seeded in 6-well plates and transfected with 800 ng pCMV.GFP, 1.2  $\mu$ g m6pBLAST:GFP-GSK3 $\alpha$  or 1.2  $\mu$ g m6pBLAST:GFP-GSK3 $\alpha$ <sup>L195G</sup> for 48 h. The kinase assay was performed as described above but using 0.4 mM ATP or 0.4 mM 6-PhEt-ATP or 0.4 mM 6-PhEt-ATP $\gamma$ S (BioLog, Life Science Institute). For experiments involving the 6-PhEt-ATP $\gamma$ S analog, the kinase reaction was performed using an equimolar amount of GST-STAT3 and His-MBP-SteE $\Delta$ N20 and the kinase reaction was allowed to proceed as described above but for 1 h. Where indicated, alkylation was performed by incubating the kinase assay samples in 2.5 mM p-Nitrobenzyl mesylate (PNBM; Abcam) for 1 h at room temperature. Thereafter, the reaction was stopped by adding 5x SDS loading buffer, samples were boiled at 95°C for 5 min and subjected to immunoblot analysis.

### Microscopy

HeLa cells, grown on glass coverslips, were infected as above and following two PBS washes were fixed in 4% paraformaldehyde in PBS for 20 min. Cells were then permeabilized and blocked in either 0.1% Triton X-100 / PBS / 10% horse serum or 0.1% Saponin / PBS / 10% horse serum before incubating the coverslips with primary and then secondary antibodies (Alexa-Flour, Invitrogen) with the addition of 0.5  $\mu$ g/mL diamidino-2-phenylindole (DAPI, Invitrogen) for 1 h at room temperature. Samples were then mounted onto glass slides using Aqua-Poly/Mount (Polysciences, Inc.) and visualized on an LSM 710 inverted confocal microscope (Zeiss GmbH) with a x 63, 1.4 numerical aperture objective.

### Protein Purification

For the bacterial expression of recombinant SteE, pET49-His-MBP-SteE $\Delta$ N20 was transformed into BL21 PC2 *E. coli* competent cells (Cherepanov, 2007). The cells were grown in LB broth at 37°C to an OD<sub>600</sub> of 0.6 to 0.8, after which protein expression was induced with 1 mM isopropyl  $\beta$ -D-1-thiogalactopyranoside (IPTG) overnight at 18°C. The cells were harvested by centrifugation and cell pellets were suspended in lysis buffer 1 (50 mM Tris-Cl pH 8, 500 mM NaCl, 0.5 mM TCEP, 10% [v/v] glycerol and protease inhibitors (Roche)) and lysed by sonication using a Bandelin Sonoplus sonicator (50% amplitude, 30 s pulse on, 10 s pulse off) for 5 min. The cell lysate was clarified at 38000  $\times g$  for 30 min at 4°C to recover the protein-containing supernatant, which was then purified using HisPur Ni-NTA resin (ThermoFisher).

Recombinant GSK3 $\beta$  and STAT3 were expressed in SF9 insect cells (ThermoFisher Scientific 11496015), according to the previously described protocol (Martino et al., 2016). For protein purification, cell pellets were resuspended in lysis buffer (50 mM Tris-Cl pH 8, 300 mM NaCl, 20 mM Imidazole, 10% [v/v] glycerol, 0.5 mM TCEP, 1 mM PMSF, 5  $\mu$ g/ $\mu$ l DNaseI, 10 mM MgCl<sub>2</sub> and protease cocktail inhibitor tablets [Roche]) and lysed with 0.5% Triton X-100. The cell lysate was clarified by centrifugation in order to recover the protein-containing supernatant, which was then purified using HisPur Ni-NTA resin.

The HisPur Ni-NTA resin was equilibrated with binding buffer (50 mM Tris-Cl pH 7.4, 500 mM NaCl, 20 mM Imidazole, 0.5 mM TCEP) before the supernatant was passed through the resin and washed thoroughly with binding buffer to remove contaminants and weak binding proteins. The protein was then eluted with 50 mM Tris-Cl pH 7.4, 500 mM NaCl, 500 mM Imidazole, 0.5 mM

TCEP and dialysed overnight in 20 mM Tris-Cl pH 7.4, 200 mM NaCl and 0.5 mM TCEP. Protein samples were collected, ran on an SDS-PAGE gel and flash-frozen with liquid nitrogen to be stored at  $-80^{\circ}\text{C}$  until use.

### Salmonella Infection

*Salmonella enterica* serovar Typhimurium, strain 14028s, and its isogenic mutants, were used for all cell culture studies. *steE* mutant *Salmonella* was made via lambda-red recombination (Datsenko and Wanner, 2000) and the wild-type strain, *sseL* mutant *Salmonella* (Mesquita et al., 2013) and other strains were a kind gift from Prof. David Holden (Imperial College London). Strains carrying pWSK29 for HA-tagged effector expression or pFCcGi (Figueira et al., 2013) for mCherry and GFP fluorescence, were grown with 50  $\mu\text{g}/\text{mL}$  carbenicillin. 50  $\mu\text{g}/\text{mL}$  kanamycin was added for the culture of bacterial mutant strains.

For SPI-1 induced infection of HeLa or 293ET cells, bacteria were grown overnight in Luria broth (LB) and sub-cultured (1:33) in fresh LB for 3.5 h prior to infection at  $37^{\circ}\text{C}$ . Cells seeded in 24-well or 6-well format were infected with 10  $\mu\text{L}$  or 23  $\mu\text{L}$  of *Salmonella*, respectively for 10 min at  $37^{\circ}\text{C}$ . Cells seeded in 10 cm dishes or T175 flasks were infected with 300  $\mu\text{L}$  or 700  $\mu\text{L}$  of bacteria. After two PBS washes, cells were incubated in 100  $\mu\text{g}/\text{mL}$  gentamycin for 1-2 h and 20  $\mu\text{g}/\text{mL}$  gentamycin thereafter.

For the infection of primary macrophages, bacteria were grown in minimal MgMES medium (170 mM 2-(N-morpholino)ethanesulfonic acid (MES) at pH 5, 5 mM KCl, 7.5 mM  $(\text{NH}_4)_2\text{SO}_4$ , 0.5 mM  $\text{K}_2\text{SO}_4$ , 1 mM  $\text{KH}_2\text{PO}_4$ , 8 mM  $\text{MgCl}_2$ , 38 mM glycerol and 0.1% casamino acids). 0.2% w/vol L-arabinose was included for the induction of GFP in strains carrying plasmid pFCcGi. Bacteria that had been opsonised with 8% mouse serum (Sigma) for 20 min were added to macrophages at MOI of 5. Following centrifugation at 100 x g for 5 min the cells and bacteria were incubated for 25 min at  $37^{\circ}\text{C}$  with 5%  $\text{CO}_2$ . Following two PBS washes to remove non-phagocytosed bacteria, cells were cultured with 50  $\mu\text{g}/\text{mL}$  gentamycin for 1 h and 15  $\mu\text{g}/\text{mL}$  thereafter.

### Salmonella In Vitro Expression Assay

To test for protein expression of the HA-tagged SteE variants, *steE* mutant *Salmonella* carrying pWSK29 with either the long or short variant of SteE expressed under the *ssaG* promoter, were sub-cultured for 4 h in minimal MgMES pH 5 media and analyzed by immunoblot.

### SDS-PAGE and Immunoblotting

To prepare whole cell lysates, cells were washed once in PBS and lysed in SDS loading buffer before sonication. For post nuclear supernatant (PNS) and pellet analysis, cells were washed once in PBS and lysed in Cell Lysis Buffer (10% glycerol, 20 mM Tris-Cl pH7.4, 150 mM NaCl, 0.1% Triton X-100) on ice for 10 min before clarification by centrifugation. SDS loading buffer was added to the PNS and pellet samples so that both fractions were in the same final volume. All samples were then heated to  $95^{\circ}\text{C}$  and separated by SDS-PAGE using either 8, 10 or 12% polyacrylamide denaturing gels, transferred to PVDF membrane (Millipore) and visualized by immunoblotting using ECL detection reagents (Dako) on a Chemidoc<sup>TM</sup> Touch Imaging System (Bio-Rad).

### STAT3 Luciferase Reporter Assay

293ET cells were seeded into 24 well plates prior to transfection with 50 ng STAT3-responsive luciferase reporter plasmid kit (QIAGEN Signal) and 250 ng of the indicated pTCMV-GFP-SteE construct. 24 h after transfection, luciferase activity in cell lysates was measured using the Dual Luciferase reporter assay system (Promega) on a Tecan Infinite 200 PRO plate reader. STAT3-dependent *Firefly* luciferase values were normalized to *Renilla* luciferase values and the fold change relative to GFP-expressing control cells was calculated.

### QUANTIFICATION AND STATISTICAL ANALYSIS

Data were tested for statistical significance with GraphPad Prism software. The number of replicates for each experiment and the statistical test performed are indicated in the figure legends. When analyzed, immunoblot band intensity was quantified using ImageLab software.

### DATA AND CODE AVAILABILITY

This study did not generate datasets or code.

Cell Host & Microbe, Volume 27

## Supplemental Information

### ***Salmonella* Effector SteE Converts the Mammalian Serine/Threonine Kinase GSK3 into a Tyrosine Kinase to Direct Macrophage Polarization**

**Ioanna Panagi, Elliott Jennings, Jingkun Zeng, Regina A. Günster, Cullum D. Stones, Hazel Mak, Enkai Jin, Daphne A.C. Stapels, Nur. Z. Subari, Trung H.M. Pham, Susan M. Brewer, Samantha Y.Q. Ong, Denise M. Monack, Sophie Helaine, and Teresa L.M. Thurston**

Figure S1, related to Figure 1: FACS gating strategies

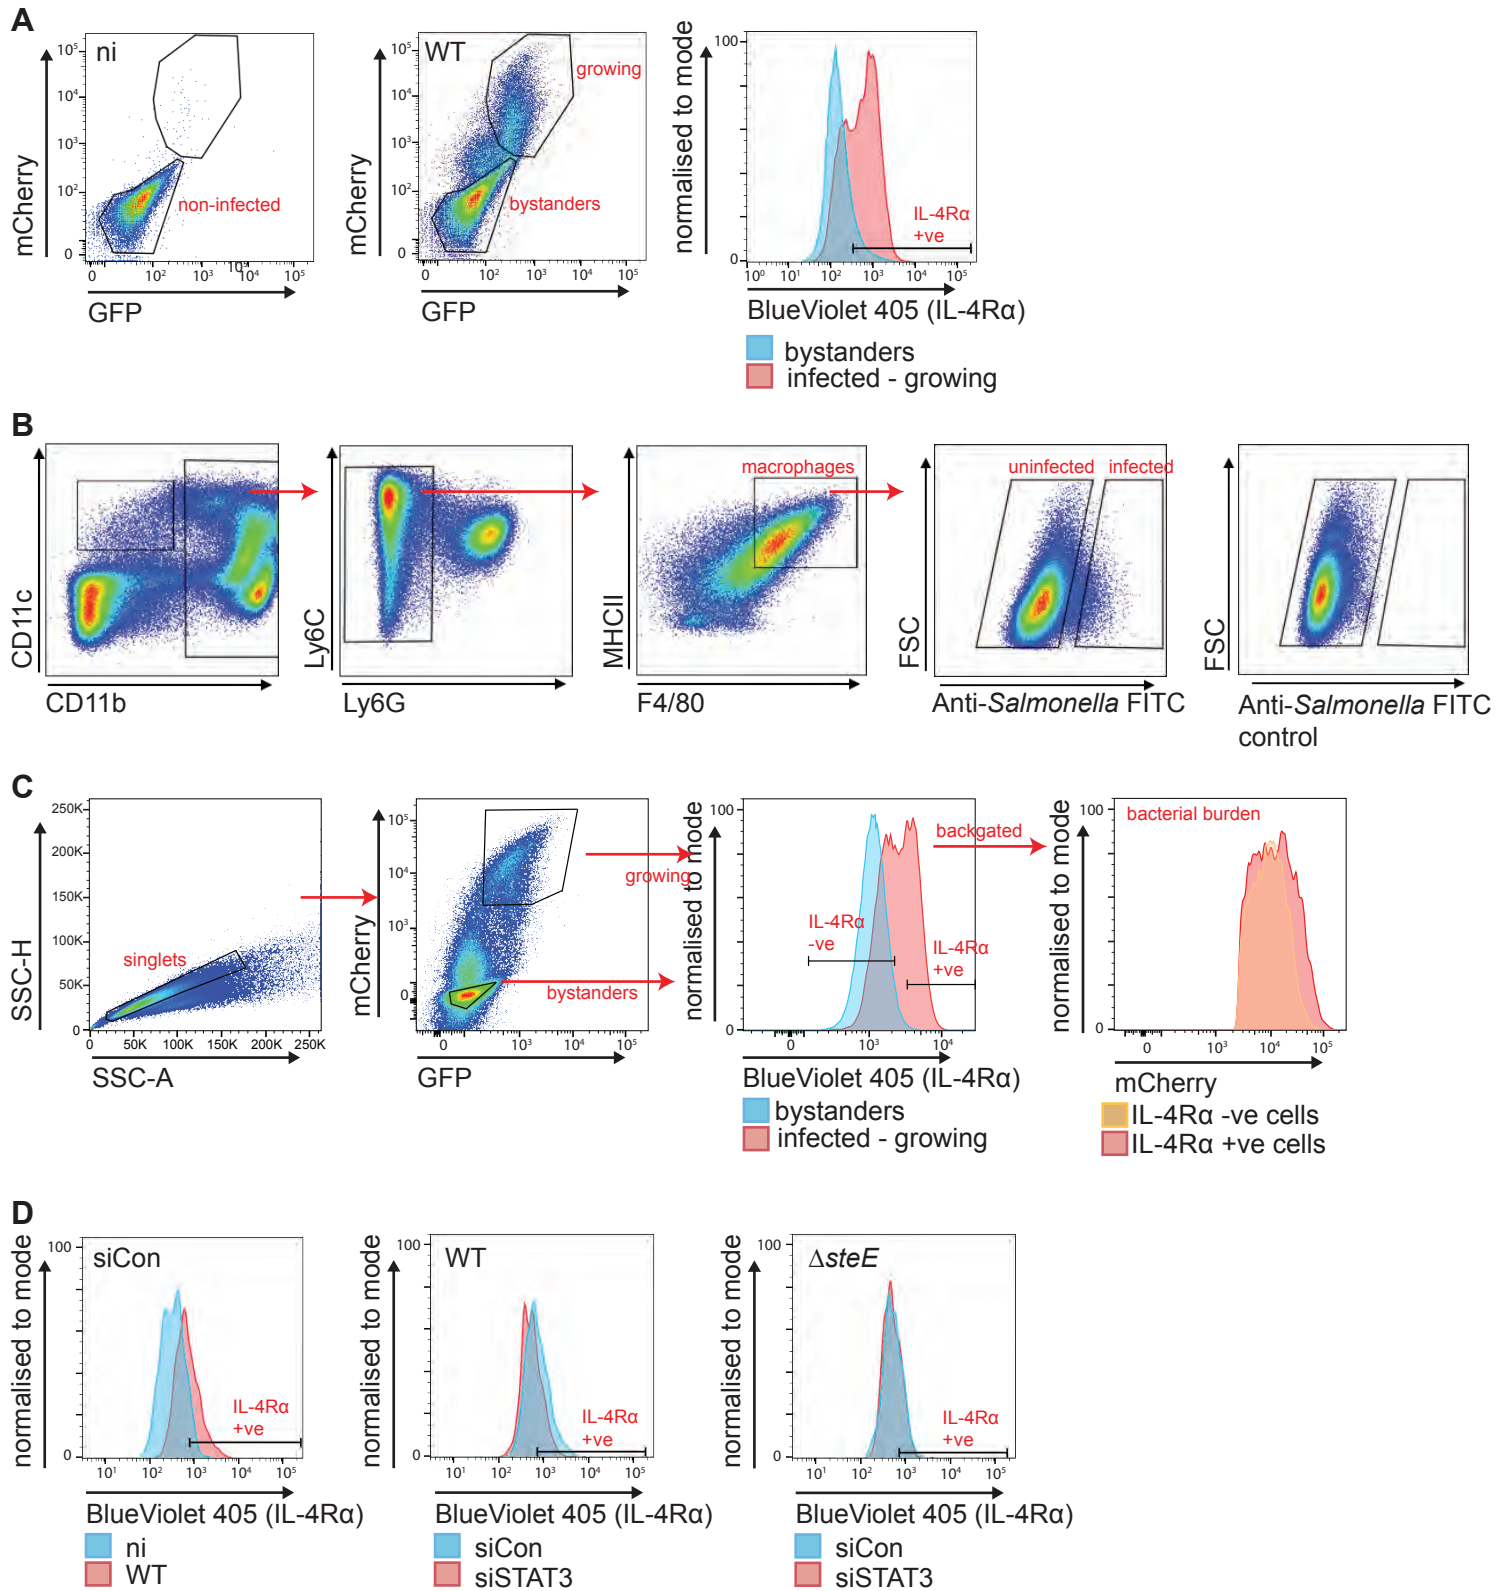

**Figure S1, related to Figure 1: FACS gating strategies**

- A) Gating strategy used in Figure 1A for pBMDMs infected for 17 hours with WT or *steE* mutant *Salmonella* carrying the fluorescent plasmid pFCcGi. Non-infected (panel 1), non-infected bystanders and cells infected with growing bacteria (panel 2) were gated as shown. Panel 3 represents the gating strategy to select the percentage of IL-4R $\alpha$ -positive cells.
- B) The FACS plots show the gating strategy used to identify CD11b<sup>+</sup>MHCII<sup>+</sup>F4/80<sup>+</sup>, Ly6G-negative mononuclear phagocytes that were non-infected or infected with *Samlonella*. The data are related to Figure 1B.
- C) Gating strategy used to sort singlet pBMDMs (panel 1) into bystanders or infected cells that contained growing (high mCherry signal) WT *Salmonella* carrying pFCcGi (panel 2). Panel 3 shows the strategy to selects cells that were IL-4R $\alpha$ -negative or -positive. Panel 4 shows a histogram representing the mCherry signal in the sorted IL-4R $\alpha$ -negative or -positive populations from WT-infected pBMDMs in the infected – growing gate. The sorted bystander cells and cells with growing bacteria that were IL-4R $\alpha$  negative or positive were then used for immunoblot analysis in Figure 1D.
- D) Gating strategy used to identify the percentage of IL-4R $\alpha$ -positive pBMDMs following treatment with control siRNA in non-infected and WT-infected cells (panel 1) as well WT (panel 2) or *steE* mutant *Salmonella* (panel 3) carrying pFCcGi in control or siSTAT3-treated pBMDMs from Figure 1E.

Figure S2, related to Figure 2: SteE interacts with the kinase domain of GSK3 and pY705-STAT3

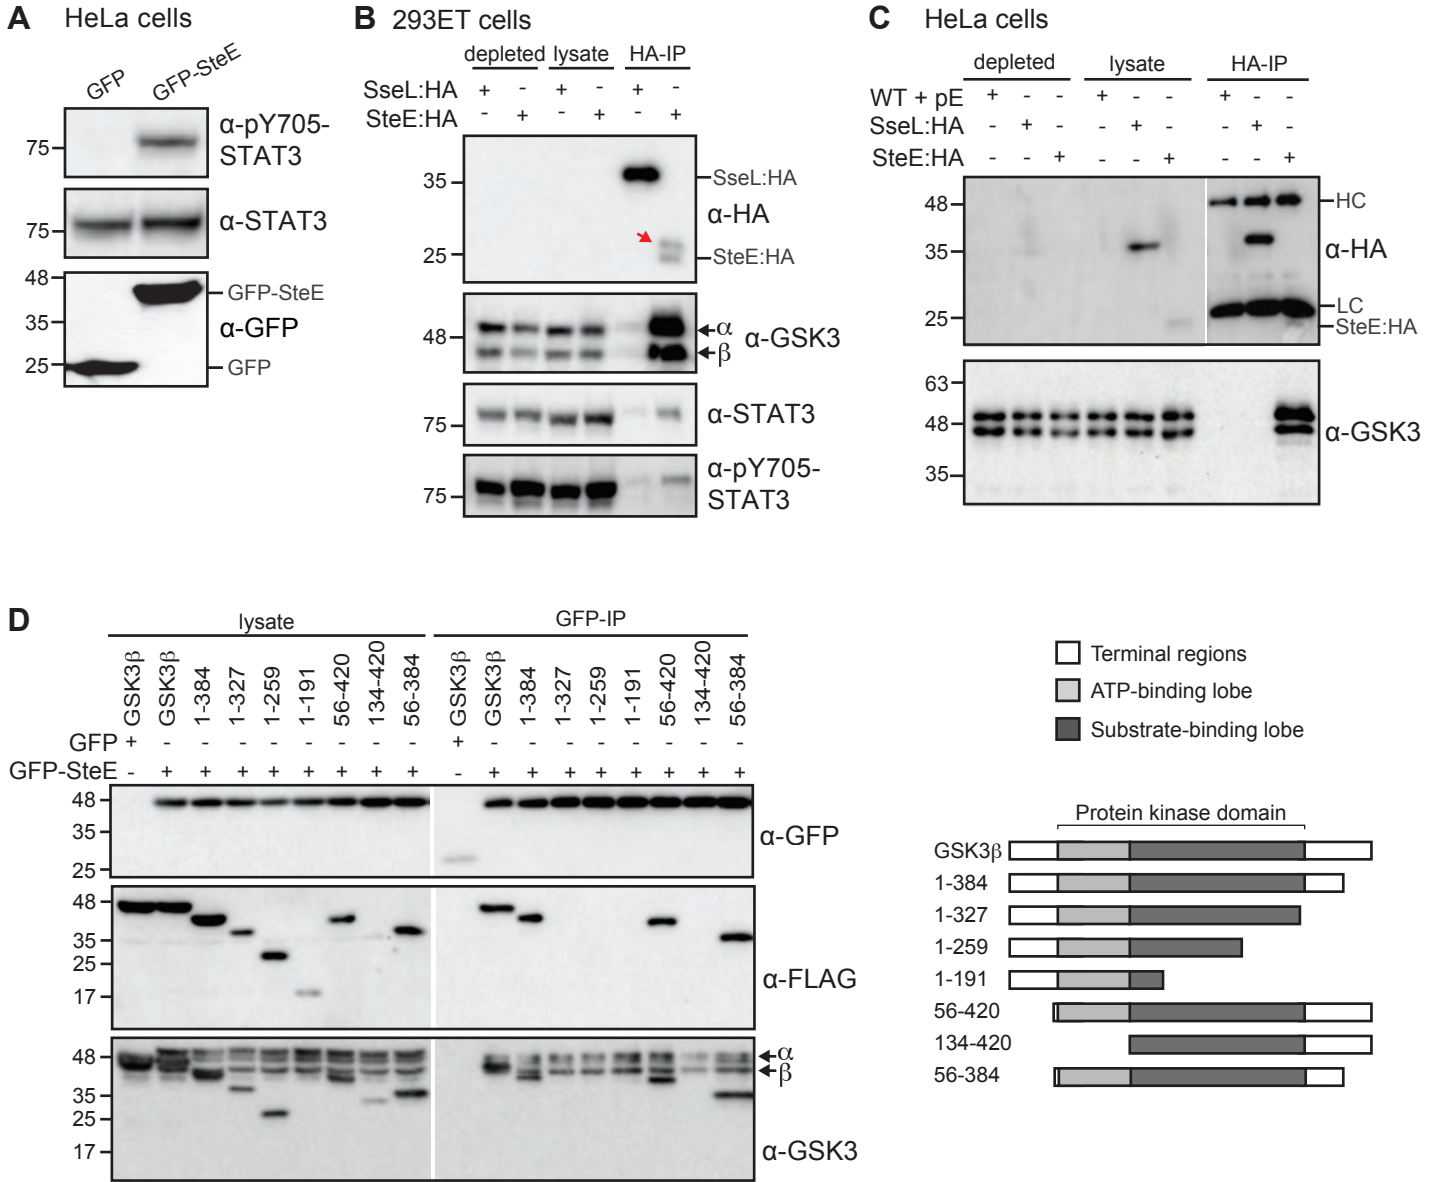



**Figure S2, related to Figure 2: SteE interacts with the kinase domain of GSK3 and pY705-STAT3**

- (A) Whole cell lysates from HeLa cells transiently expressing GFP or GFP-SteE were analysed by immunoblot with antibodies against STAT3, pY705-STAT3 and GFP. Data are representative of three independent experiments.
- (B) 293ET cells were infected with *steE* mutant *Salmonella* carrying pWSK29-SteE:HA or *sseL* mutant *Salmonella* carrying pWSK29-SseL:HA for 17 hours after which HA-tagged effectors were immunoprecipitated from cell lysates and assessed for their ability to bind endogenous GSK3, STAT3 or pY705-STAT3 as indicated. Immunoblots are representative of three independent experiments. The red arrow indicates a higher molecular weight form of SteE.
- (C) HeLa cells infected with WT *Salmonella* carrying an empty plasmid (pE), *steE* mutant *Salmonella* carrying the pWSK29-SteE:HA plasmid or *sseL* mutant *Salmonella* carrying pWSK29-SseL:HA were lysed at 17 hours post infection and HA-tagged proteins immunoprecipitated using anti-HA agarose. Depleted lysates, lysates and HA-immunoprecipitated samples were then probed by immunoblot for HA and endogenous GSK3. Data represents three independent experiments. HC – heavy chain; LC – light chain.
- (D) GFP or GFP-SteE was co-expressed in 293ET cells with the indicated FLAG-tagged GSK3 variants, followed by cell lysis and GFP immunoprecipitation. Lysate and IP samples were analysed by immunoblotting for GFP, FLAG or endogenous GSK3. A schematic of the GSK3 variants is shown. Data shown are representative of three repeats.

Figure S3, related to Figure 3: GSK3 kinase activity is required for *Salmonella* but not IL-10-induced STAT3 activation or macrophage M2 polarization

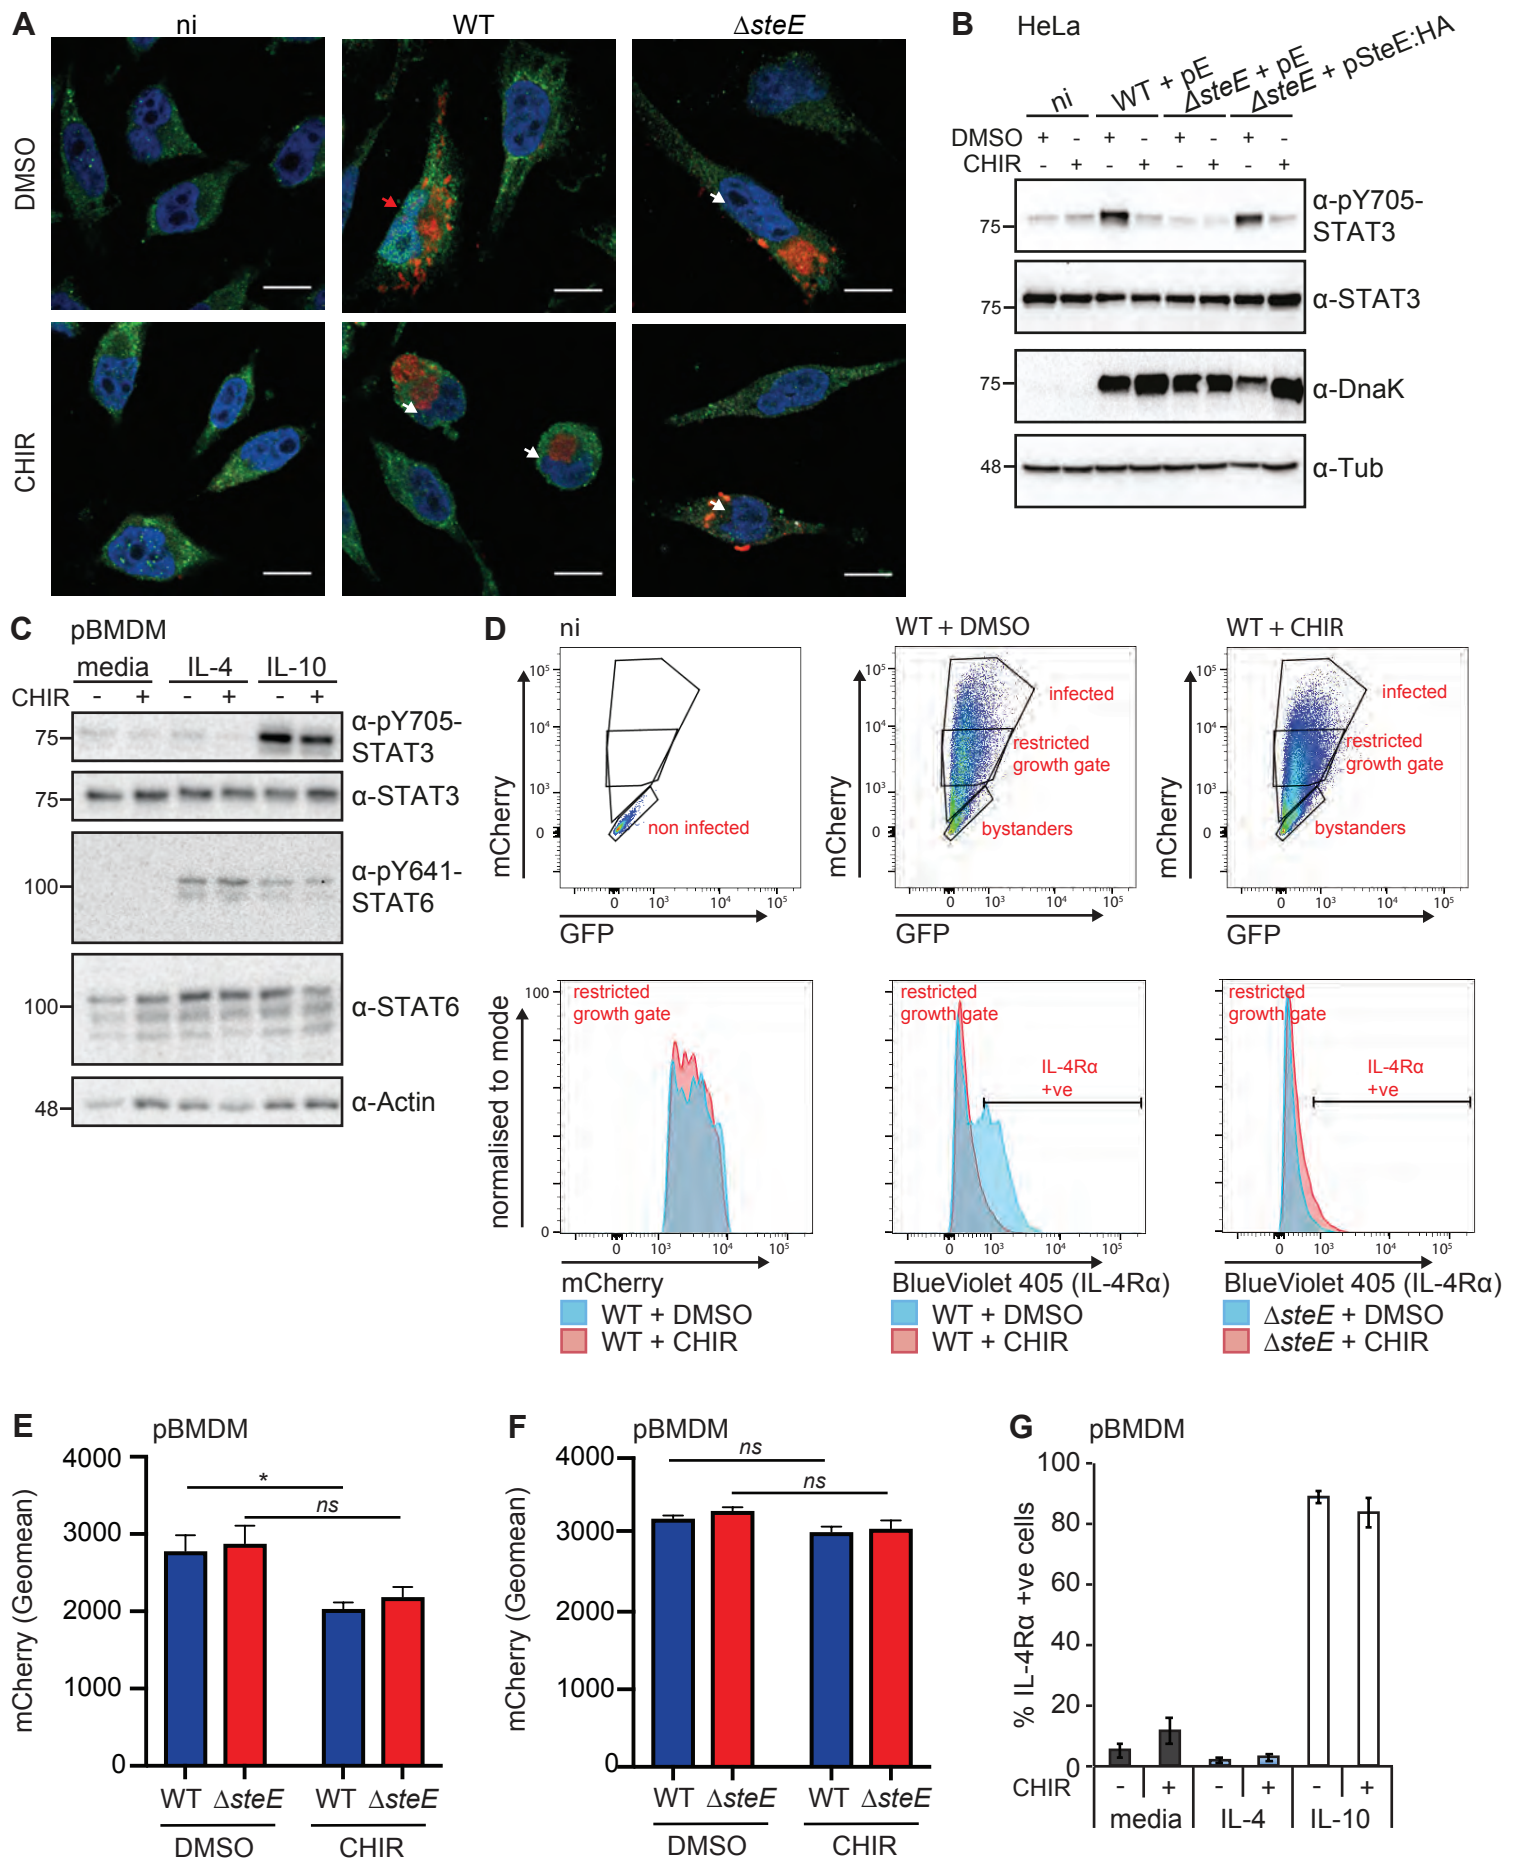

**Figure S3, related to Figure 3: GSK3 kinase activity is required for *Salmonella* but not IL-10-induced STAT3 activation or macrophage M2 polarization**

- (A) HeLa cells were infected with the indicated *Salmonella* strains and treated with DMSO or 5  $\mu$ M CHIR99021 from 1 hour post uptake. At 17 hours post infection, the cells were fixed, permeabilised then labelled for Y705-phosphorylated STAT3 (green), CSA1 (*Salmonella*, red) and DAPI (nucleus, blue). The red arrow indicates a cell where enriched nuclear pY705-STAT3 was detected, white arrows indicate infected cells showing background / diffuse cytosolic pY705-STAT3 signal, as quantified in Figure 3A. Scale bar, 10  $\mu$ m.
- (B) HeLa cells were infected with the indicated *Salmonella* strains for 17 hours and treated with DMSO or 5  $\mu$ M CHIR99021 from 1 hour post uptake. Cell lysates were analysed by immunoblotting with antibodies against active STAT3 (pY705), STAT3, DnaK for a *Salmonella* infection control or tubulin (Tub) as a loading control. Immunoblots are representative of three independent experiments.
- (C) pBMDMs were treated with either 20 mg/ml IL-4 or 20 mg/ml IL-10 for 17 hours in the presence or absence of 5  $\mu$ M CHIR99021. Cell lysates were analysed by immunoblotting with antibodies against active STAT3 (pY705), STAT3, active STAT6 (pY641), STAT6 or actin as a loading control. Data are representative of two independent experiments.
- (D) Gating strategy used in Figure 3C to identify non-infected, bystander and infected pBMDMs that had been infected for 17 hours with WT or *steE* mutant *Salmonella* carrying the fluorescent plasmid pFCcGi. A restricted growth gate was used for analysis of cells with a similar bacterial burden between DMSO and CHIR9902-treated samples. Representative histograms showing the mCherry fluorescence for WT-infected cells backgated on the restricted growth gate and IL-4R $\alpha$  gating strategy for WT and *steE* mutant infected DMSO and CHIR9902-treated are shown in the lower panels.
- (E) Analysis of mCherry geometric mean fluorescence in pBMDMs infected for 17 hours using the “infected” gate shown in (D). Mean and SEM of three independent experiments. *ns* – not significant, \*  $P < 0.05$ , two-way ANOVA with Bonferroni’s multiple comparisons tests.
- (F) Analysis of mCherry geometric mean fluorescence in pBMDMs infected for 17 hours using the “restricted growth gate” as shown in (D). Mean and SEM of three independent experiments. *ns* – not significant, two-way ANOVA with Bonferroni’s multiple comparisons tests.
- (G) pBMDMs, treated as in (C) were analysed by flow cytometry for the percentage of IL-4R $\alpha$ -positive cells. Mean and SEM of four independent experiments.

Figure S4, related for Figure 3: SteE:HA but not GFP-SteE is degraded in the absence of active GSK3

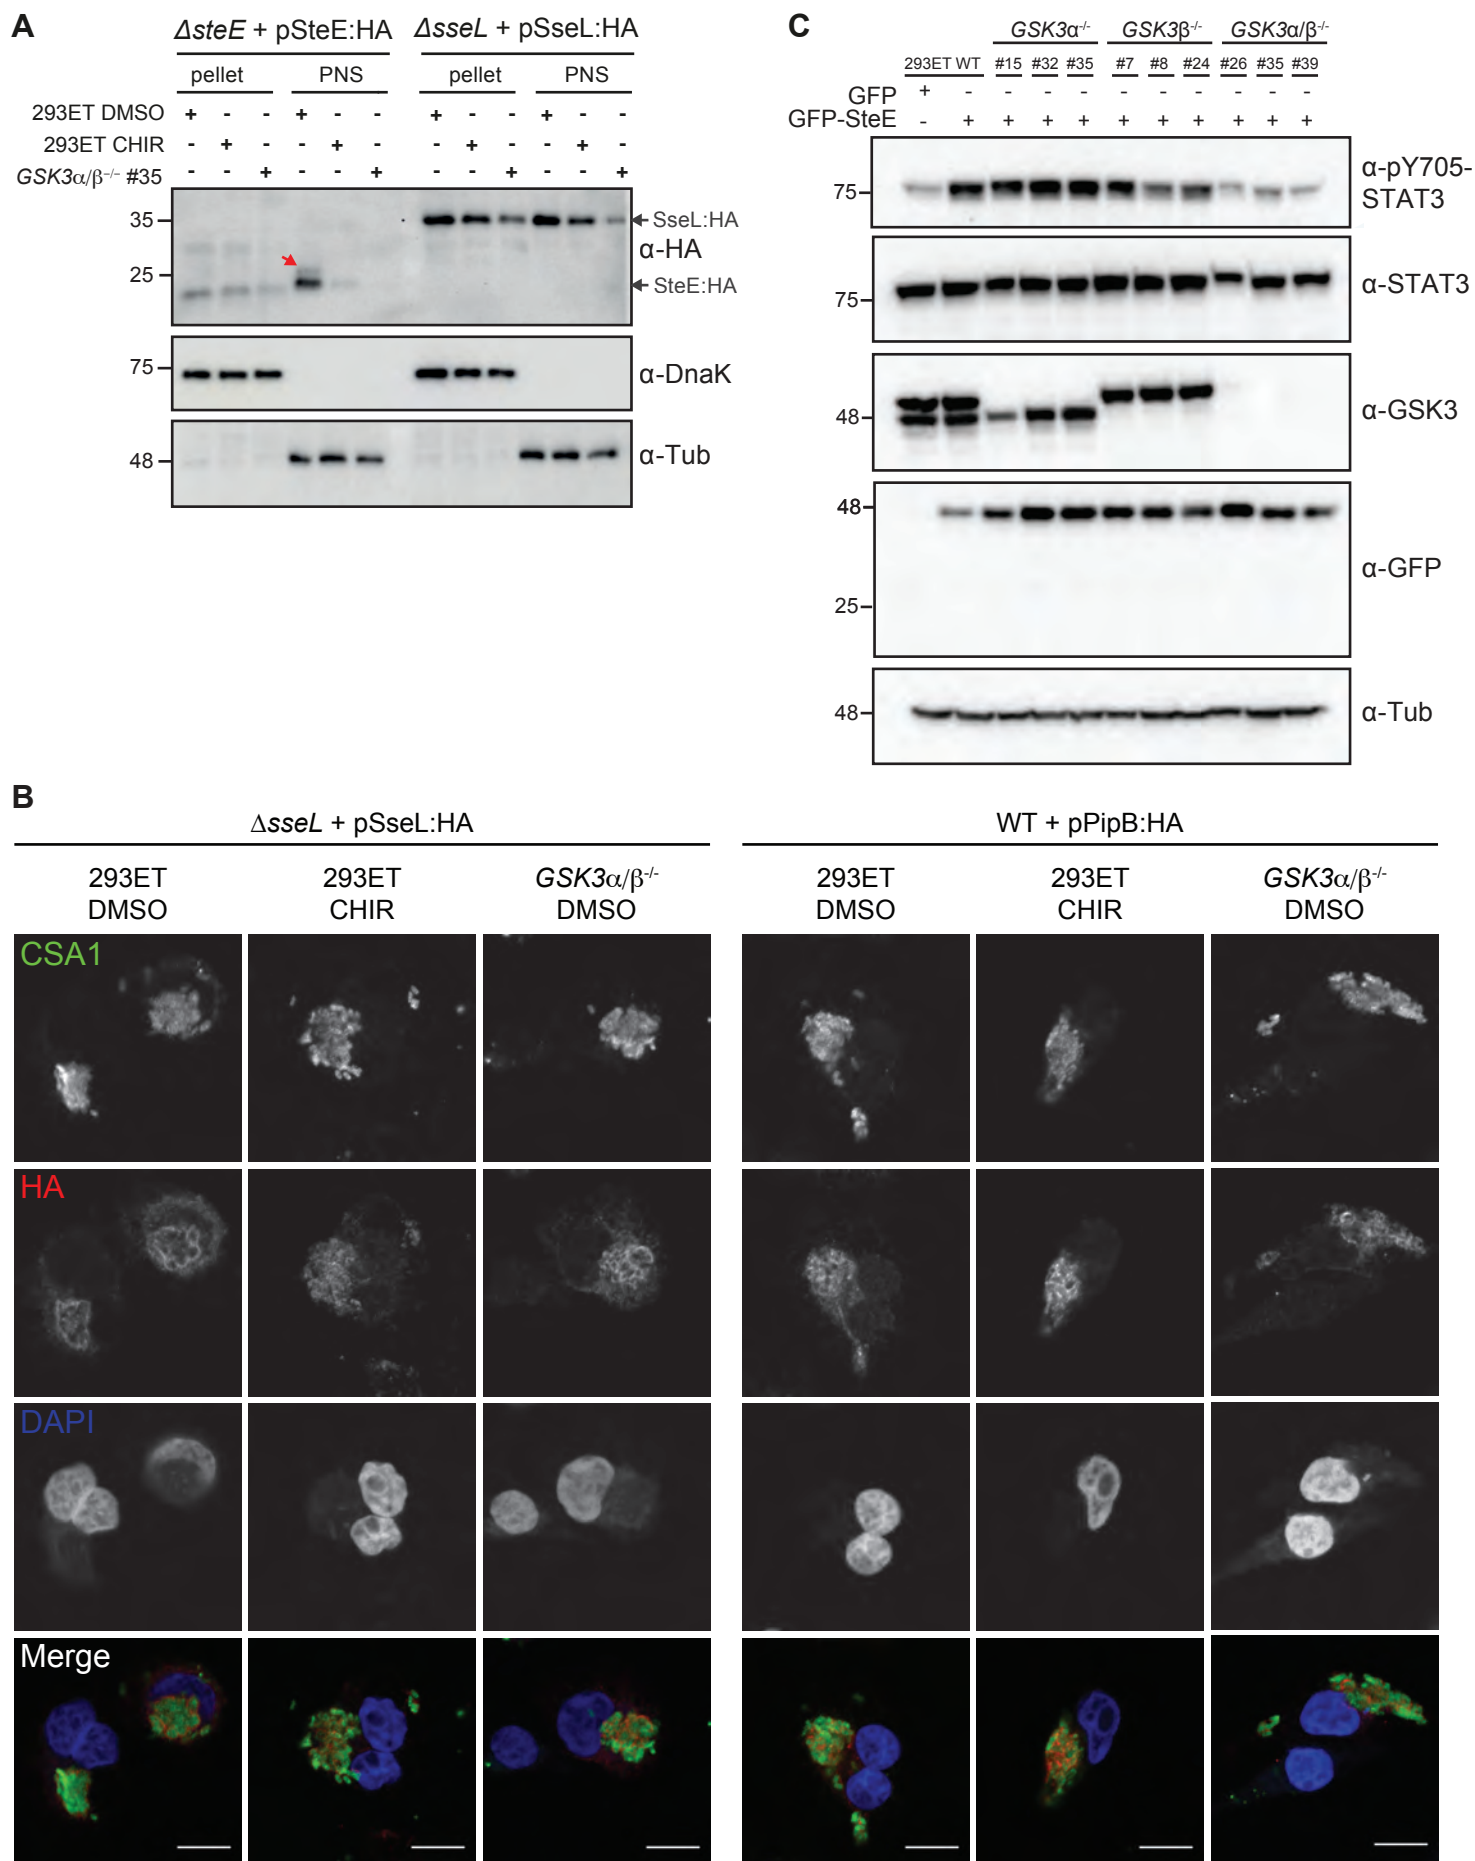

**Figure S4, related to Figure 3: SteE:HA but not GFP-SteE is degraded in the absence of active GSK3**

- (A) Translocation of HA-tagged SteE or SseL T3SS effectors detected in cell pellet or post nuclear supernatant (PNS) after lysis of the indicated cell lines at 17 hours post infection. Where specified, cells were treated with 5  $\mu$ M GSK3 inhibitor CHIR99021 or DMSO as vehicle control from 1 hour post infection. The red arrow indicates a higher molecular weight form of SteE. Data are representative of two repeats.
- (B) Representative confocal micrographs of 293ET cells infected with the indicated *Salmonella* strains and treated with either DMSO or 5  $\mu$ M GSK3 inhibitor CHIR99021 at 1 hour post infection. Samples were fixed at 17 hours post infection, permeabilised with saponin and labelled for CSA1 (*Salmonella*, green), HA (effector, red) and DAPI (nucleus, blue). Scale bar, 10  $\mu$ m.
- (C) GFP or GFP-SteE was transiently expressed in either WT 293ET cells or the indicated GSK3 knockout cell line clones and cell lysates were immunoblotted with the indicated antibodies. Immunoblots are representative of two experiments.

Figure S5, related for Figure 4: STAT3 and SteE are phosphorylated by a GSK3-containing complex

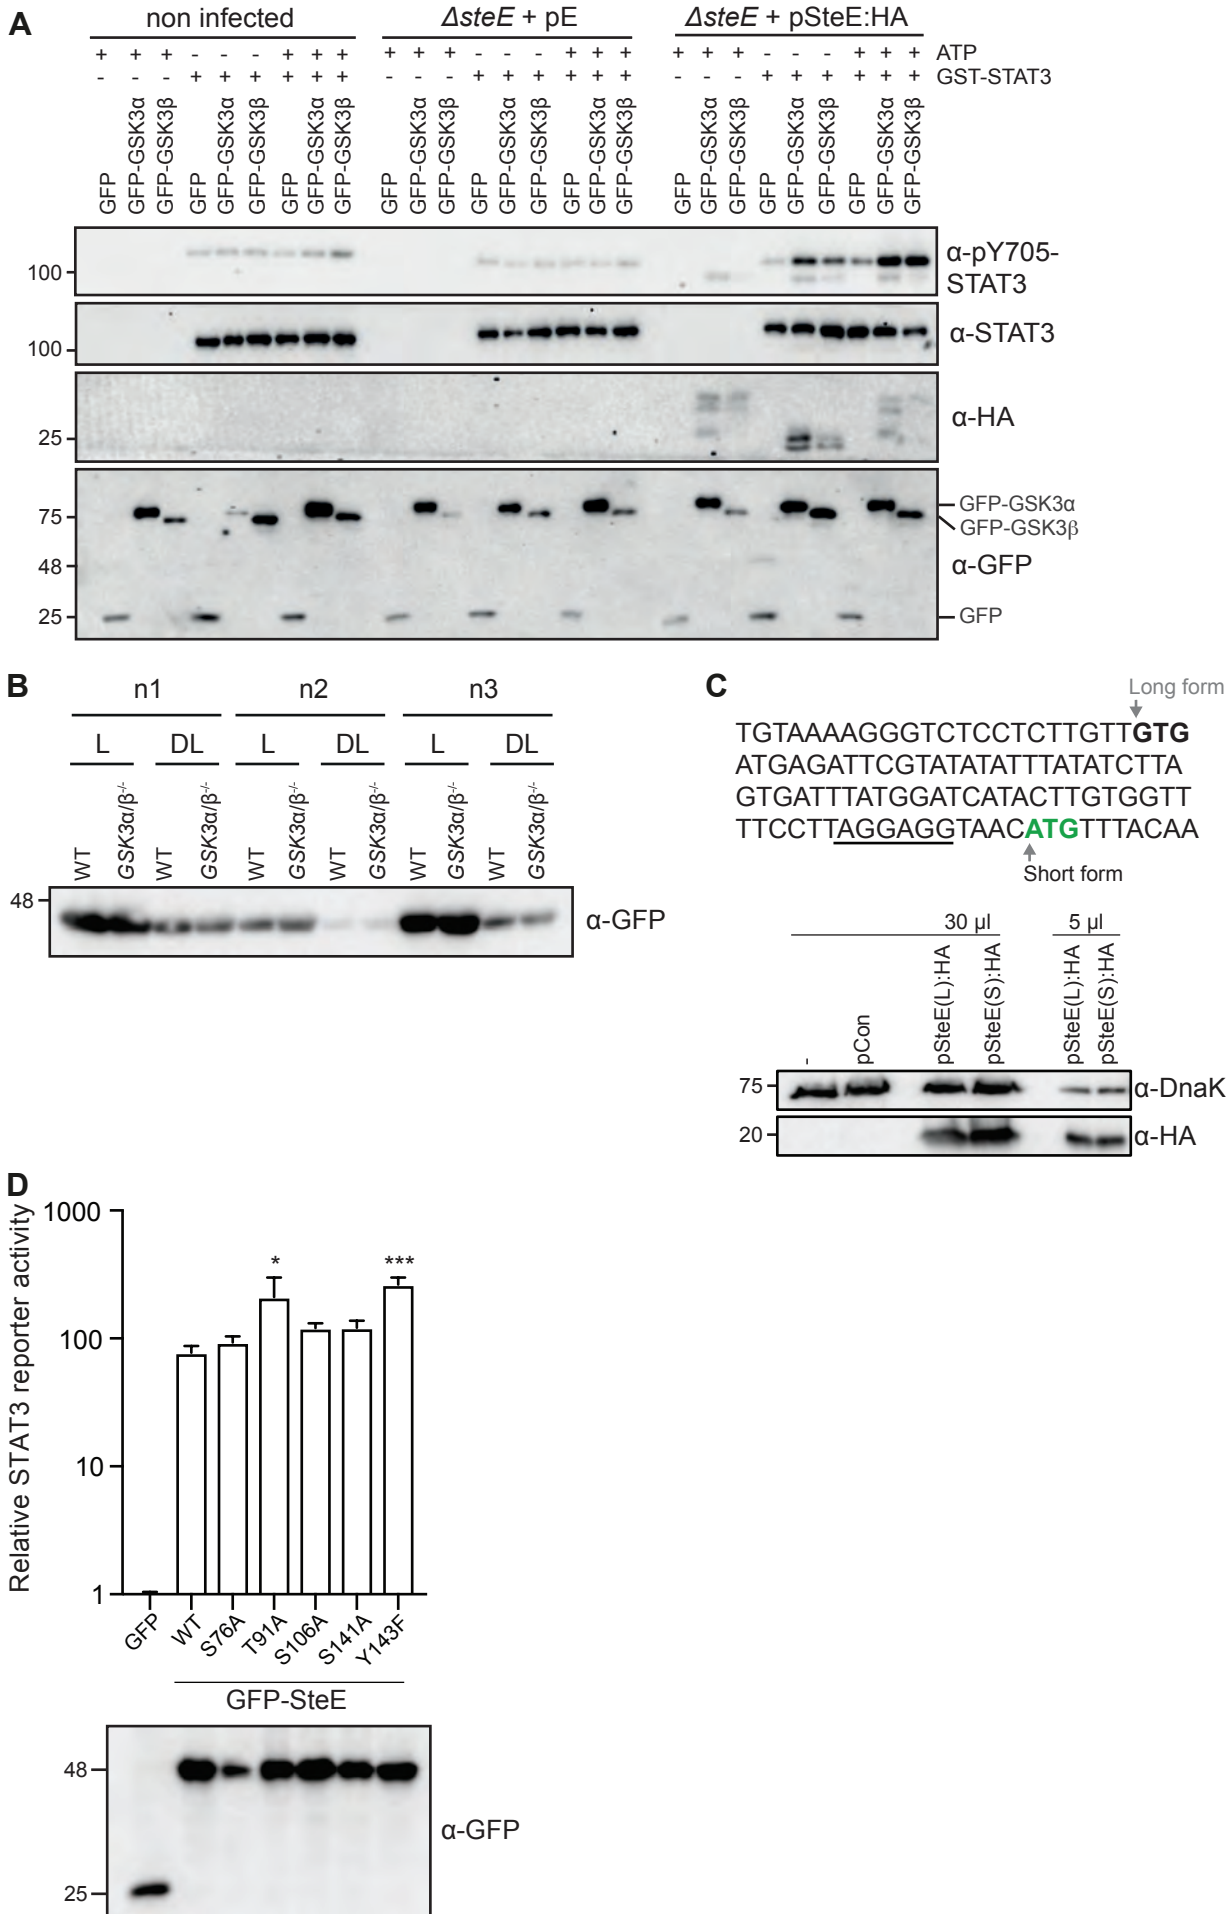

**Figure S5, related to Figure 4: STAT3 and SteE are phosphorylated by a GSK3-containing complex**

- (A) 293ET cells stably expressing GFP, GFP-GSK3 $\alpha$  or GFP-GSK3 $\beta$  were infected with the indicated *Salmonella* strains for 17 hours. Subsequently, the cells were lysed and GFP-tagged proteins were immunoprecipitated and assessed for their ability to phosphorylate exogenously added recombinant GST-STAT3 in an *in vitro* kinase assay with and without ATP. Data are representative of three independent repeats.
- (B) Expression analysis of GFP-SteE in WT or GSK3 $\alpha/\beta$ <sup>-/-</sup> 293ET cells in lysates (L) or depleted lysates (DL) after anti-GFP immunoprecipitation. This figure corresponds to the mass spectrometry data shown in Figure 4C.
- (C) Nucleotide sequence prior to the annotated start GTG (bold) for STM2585, uniprot# Q8ZN17 (“Long” form) and including the start ATG (green) for the “Short” form with the consensus Shine-Dalgarno sequence underlined. Immunoblot analysis of *steE* mutant *Salmonella* carrying either no plasmid (-), control plasmid (pCon), or the long (L) or short (S) forms of SteE:HA following *in vitro* growth of *Salmonella* at pH 5.
- (D) Luciferase activity in cell lysates from 293ET cells co-transfected with plasmids encoding a STAT3-dependent *Firefly* luciferase, a constitutively expressed *Renilla* luciferase and GFP or the indicated GFP-SteE variant. Data are presented as the fold change in STAT3 reporter activity from GFP-expressing cells and represent the mean and SEM of four independent experiments. Statistical significances were calculated from wild-type GFP-SteE. \*  $P < 0.05$ , \*\*\*  $P < 0.001$ , one-way ANOVA with Dunnett’s post hoc analysis for multiple comparisons. A representative anti-GFP immunoblot is shown for each expressed construct.

Figure S6, related to Figure 5: Analysis of STAT3 phosphorylation by GSK3

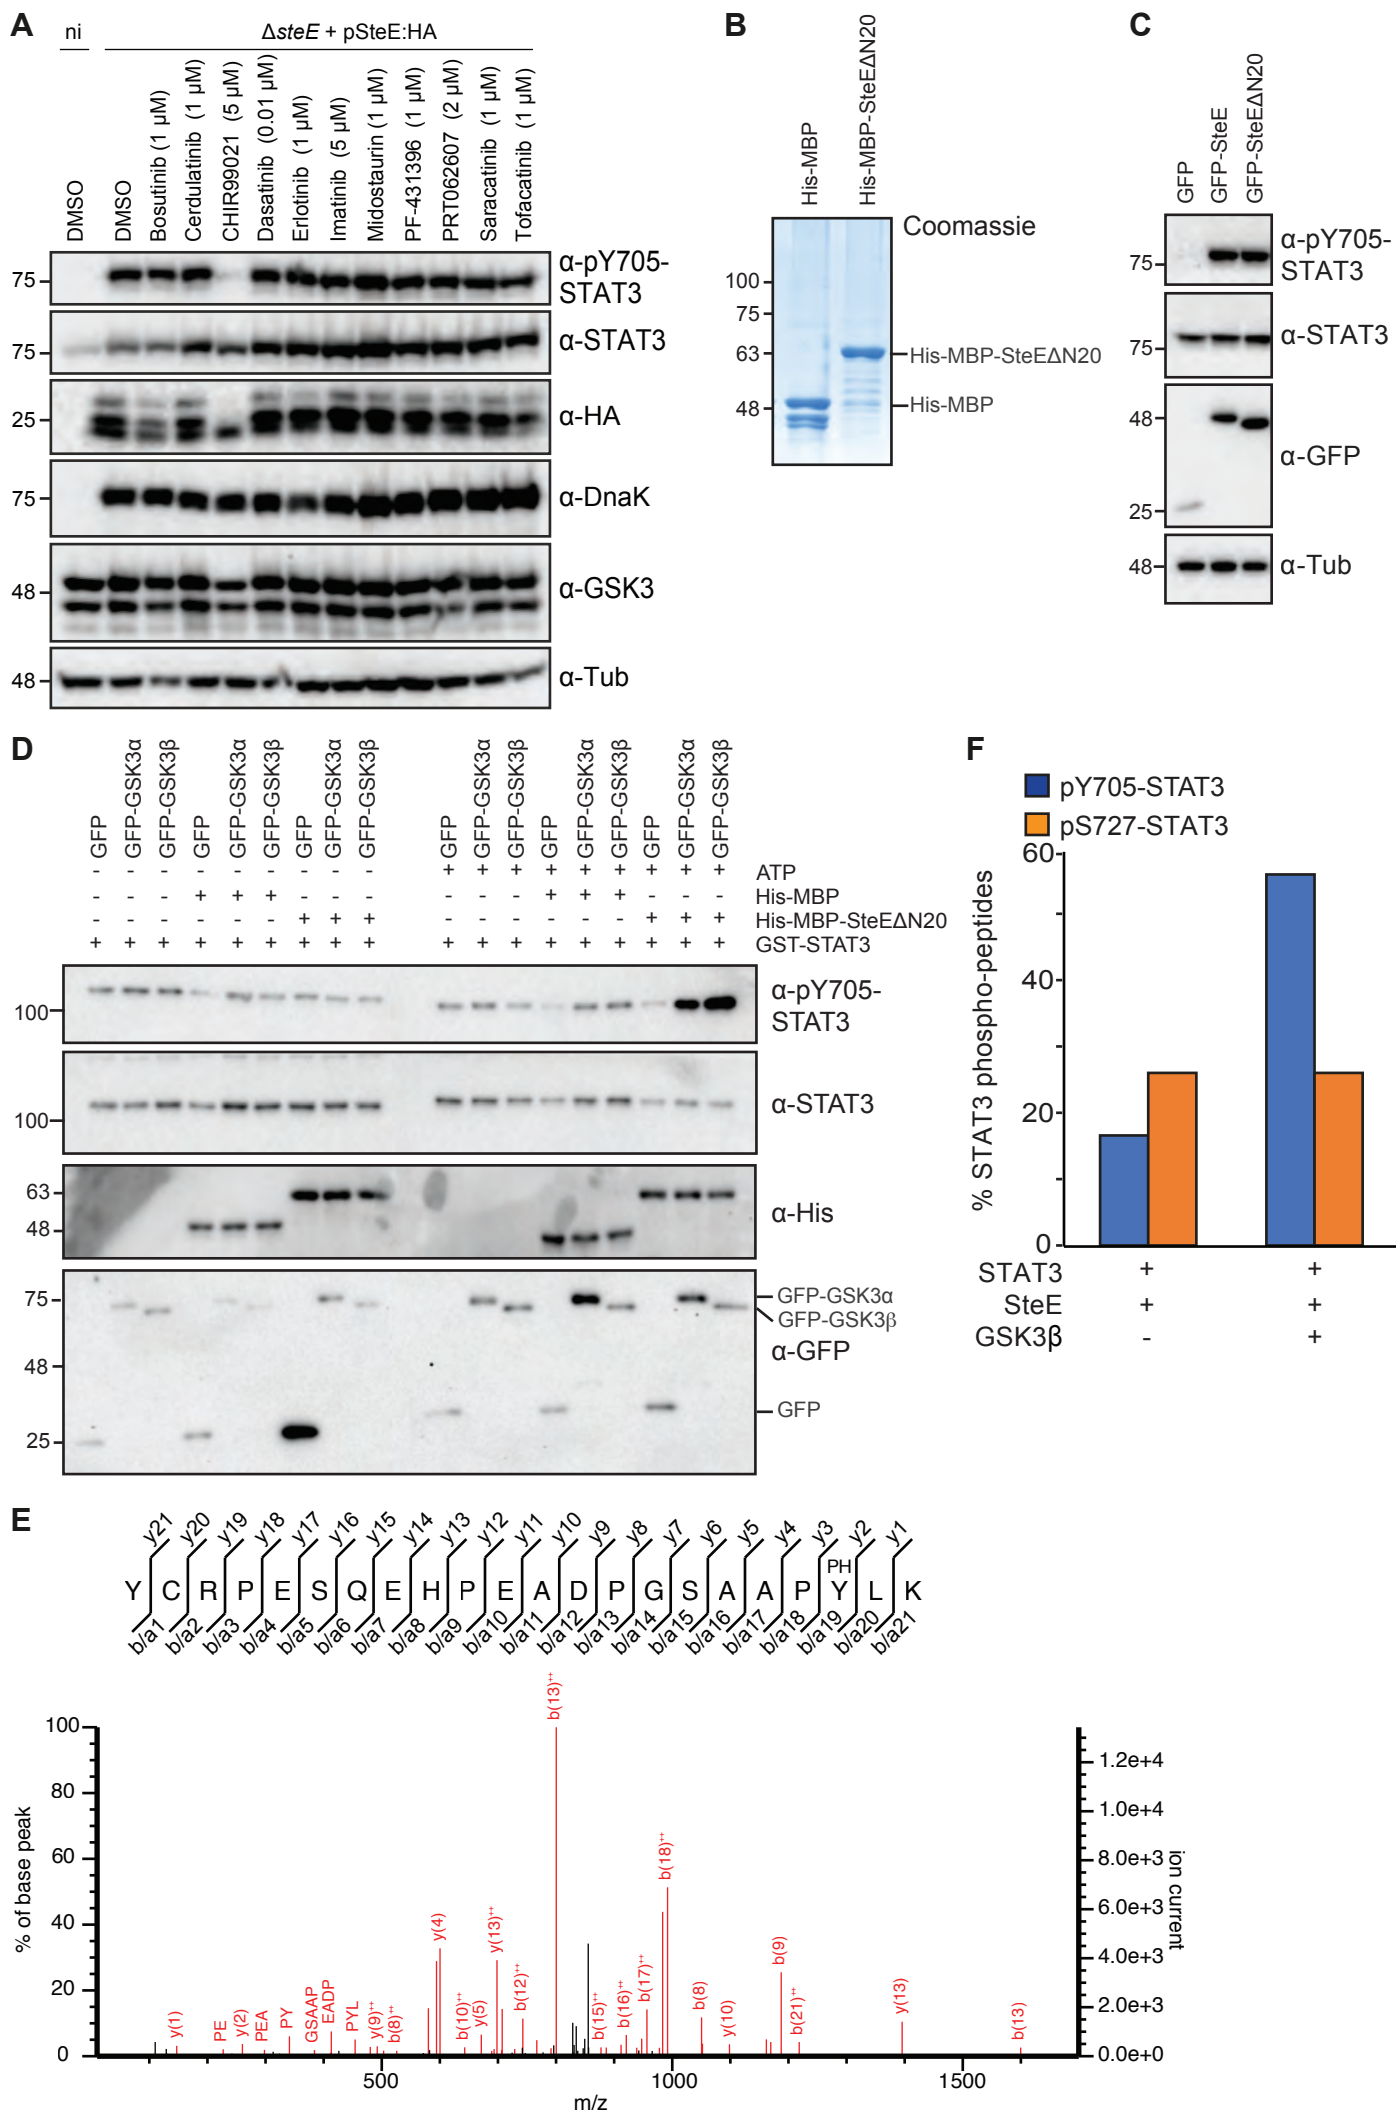



**Figure S6, related to Figure 5: Analysis of STAT3 phosphorylation by GSK3**

- (A) WT 293ET cells were either non-infected (ni) or infected with *steE* mutant *Salmonella* carrying pWSK29-SteE:HA for 17 hours and treated with DMSO or the indicated drug at 1 hour post infection. Whole cell lysates were analysed for STAT3 and pY705-STAT3, as well as HA (SteE), DnaK (*Salmonella*) and tubulin (Tub) as a loading control. Data are representative of two independent repeats.
- (B) Coomassie of recombinant protein used in *in vitro* kinase assays. His-MBP or His-MBP-SteE $\Delta$ N20 were expressed in *E. coli* and purified on nickel beads.
- (C) GFP, GFP-SteE or GFP-SteE $\Delta$ N20 was transiently expressed in 293ET cells and cell lysates were then immunoblotted for STAT3, pY705-STAT3, GFP and tubulin (Tub) as a control.
- (D) Cell lysates from 293ET cells stably expressing GFP, GFP-GSK3 $\alpha$  or GFP-GSK3 $\beta$  were prepared and GFP immunoprecipitated proteins were used in *in vitro* kinase assays containing 0.4  $\mu$ g recombinant GST-STAT3 and either buffer alone, recombinant His-MBP or recombinant His-MBP-SteE $\Delta$ N20, with and without 1 mM ATP. Protein expression, and STAT3 phosphorylation were then analysed by immunoblot with the indicated antibodies. Data are representative of two independent repeats.
- (E) Recombinant STAT3 was incubated with recombinant SteE with or without recombinant His-GSK3 $\beta$  in an *in vitro* kinase assay and subjected to mass spectrometry. A representative fragment analysis of a STAT3 Y705 containing peptide from the GSK3 $\beta$ -positive sample is shown.
- (F) The ratio of phosphorylated and non-phosphorylated STAT3 peptides containing Y705 or S727 from the samples described in (E) are shown. Data is obtained from two independent experiments.

**Table S1. PCR primers related to Key Resource Table**

| Plasmid                                               | Sequence (5' → 3')                           | Forward/<br>Reverse                     | Restriction<br>site | Purpose                                                              |
|-------------------------------------------------------|----------------------------------------------|-----------------------------------------|---------------------|----------------------------------------------------------------------|
| pWSK29.ssaG                                           | CATGGAATTCCTTGTGGTTTT<br>CCTTAGGAGGTA        | Forward                                 | EcoRI               | Amplification of SteE<br>(short) + 25 bp Shine-<br>Dalgarno sequence |
|                                                       | CATGGAATTCGCATGTAAAAG<br>GGTCTCCTCTT         | Forward                                 | EcoRI               | Amplification of SteE<br>(long) + 25 bp Shine-<br>Dalgarno sequence  |
|                                                       | CATGGGATCCTTCATCCGGG<br>AAAACCTCTGC          | Reverse                                 | BamHI               | Amplification of SteE<br>(short/long)                                |
| ptCMV/m4p/m6p                                         | CGCGGGCCATGGCAATGTTT<br>ACAATTAATAGTACTAA    | Forward                                 | NcoI                | Amplification of SteE<br>(short)                                     |
|                                                       | CGCGGGGCGGCCGCTTATTC<br>ATCCGGGAAAACCTCTG    | Reverse                                 | NotI                | Amplification SteE                                                   |
|                                                       | CGCGGGCTCATGACAATGAG<br>CGGCGGCGGGCCTTCGGGA  | Forward                                 | BspHI               | Amplification GSK3α                                                  |
|                                                       | CGCGGGGCGGCCGCTCAGG<br>AGGAGTTAGTGAGGGTA     | Reverse                                 | NotI                | Amplification of GSK3α                                               |
|                                                       | CGCGGGACATGTCAGGGCG<br>GCCCAGAACC            | Forward                                 | PciI                | Amplification of GSK3β                                               |
|                                                       | CGCGGGGCGGCCGCTCAGG<br>TGGAGTTGGAAGCTGATG    | Reverse                                 | NotI                | Amplification of GSK3β                                               |
|                                                       | CATGGCGGCCGCTCAGGCAG<br>TTGGTGATACTCC        | Reverse                                 | NotI                | Amplification of GSK3β<br>(1-327)                                    |
|                                                       | CATGGCGGCCGCTCACCCCTG<br>GAAATATTGGTTG       | Reverse                                 | NotI                | Amplification of GSK3β<br>(1-259)                                    |
|                                                       | CATGGCGGCCGCTCAAGGAT<br>CCAACAAGAGGTTT       | Reverse                                 | NotI                | Amplification of GSK3β<br>(1-191)                                    |
|                                                       | CATGGCGGCCGCTCAATAGT<br>CCAGCACCGATTAAG      | Reverse                                 | NotI                | Amplification of GSK3β<br>(1-134)                                    |
|                                                       | CATGACATGTCATATACAGAC<br>ACTAAAGTGATTGGAAATG | Forward                                 | PciI                | Amplification of GSK3β<br>(56-420)                                   |
|                                                       | ptCMV/m4p/m6p                                | CATGACATGTCATATGTTCCG<br>GAAACAGTATACAG | Forward             | PciI                                                                 |
| GACCAGGGAAGTTCGCCA<br>TCGCGAAGGTTCTCCAGGAC<br>AAGAGG  |                                              | Forward                                 | Internal<br>primer  | Amplification of GSK3α<br>K148A                                      |
| CCTCTTGCCTGGAGAACCTT<br>CGCGATGGCGACTAGTTCCC<br>TGCTC |                                              | Reverse                                 | Internal<br>primer  | Amplification of GSK3α<br>K148A                                      |
| CAGGAGAACTGGTCGCCATC<br>GCGAAAGTATTGCAGGACAA<br>GAGA  |                                              | Forward                                 | Internal<br>primer  | Amplification of GSK3β<br>K85A                                       |
| TCTCTTGCCTGCAATACTTT<br>CGCGATGGCGACCAGTTCTC<br>CTG   |                                              | Reverse                                 | Internal<br>primer  | Amplification of GSK3β<br>K85A                                       |
| AATCTGGTGGGTGAATATGT<br>GCCCGAGACA                    |                                              | Forward                                 | Internal<br>primer  | Amplification of GSK3α<br>L195G                                      |
| CACATATTCACCCACCAGATT<br>TAGGTAAG                     |                                              | Reverse                                 | Internal<br>primer  | Amplification of GSK3α<br>L195G                                      |
| GGATTACAGGAACGTATAGC<br>ACTCGAGTACCAGCCCCTG           |                                              | Forward                                 | Internal<br>primer  | Amplification of SteE<br>S76A                                        |
| CAGGGGCTGGTACTCGAGTG<br>CTATACGTTCTGTAATCC            |                                              | Reverse                                 | Internal<br>primer  | Amplification of SteE<br>S76A                                        |
| ATTGTTTTTCTACTCGGCGCG<br>CCTGCAGTTTTAGAGACT           |                                              | Forward                                 | Internal<br>primer  | Amplification of SteE<br>T91A                                        |

|         |                                                                                                        |         |                    |                                          |
|---------|--------------------------------------------------------------------------------------------------------|---------|--------------------|------------------------------------------|
|         | AGTCTCTAAAACCTGCAGGCG<br>CGCCGAGTAGAAAAACAAT                                                           | Reverse | Internal<br>primer | Amplification of SteE<br>T91A            |
|         | TCTTTATCATTACCAGTTGCG<br>CCGGATGCTTTAACCCAA                                                            | Forward | Internal<br>primer | Amplification of SteE<br>S106A           |
|         | TTGGGTAAAGCATCCGGCG<br>CAACTGGTAATGATAAAGA                                                             | Reverse | Internal<br>primer | Amplification of SteE<br>S106A           |
|         | CGCGGGGCGGCCGCTTATTC<br>ATCCGGGAAAACCTCTGCAG<br>AATGCCTGTATTGAGCGATAT<br>AACCAGCCGGTGGGTTATGA<br>CTGGC | Reverse | NotI               | Amplification of SteE<br>S141A           |
|         | CGCGGGGCGGCCGCTTATTC<br>ATCCGGGAAAACCTCTGCAG<br>AATGCCTGTATTGAGCGATAA<br>AACCAGCCGGTGGGTTATGA<br>CTGGC | Reverse | NotI               | Amplification of SteE<br>Y143F           |
|         | CGCGGGGCGGCCGCTTATTC<br>ATCCGGGAAAACCTCTGCAG<br>AATGCCTGTATTGAGCGATAA<br>AACCAGCCGGTGGGTTATGA<br>CTGGC | Reverse | NotI               | Amplification of SteE<br>S141A and Y143F |
| m6p     | CGCGGGACATGTCAGATGTT<br>AATTTAGAGGAC                                                                   | Forward | Pcil               | Amplification of SteE<br>(short) ΔN20    |
|         | GAGCTGTACAAGGACATGAC<br>AATGAGCGGCCG                                                                   | Forward | Gibson<br>cloning  | Amplification of GFP-<br>GSK3α           |
|         | TCCGGATCTGTTAACGCGGC<br>CGCTCAGGAGGAGTT                                                                | Reverse | Gibson<br>cloning  | Amplification of GFP-<br>GSK3α           |
| pET49   | CCTCTTTCAGGGACCCGGTA<br>GCGATGTTAATTTAGAGGAC                                                           | Forward | Gibson<br>cloning  | Amplification of SteE<br>ΔN20            |
|         | CCGCGTGGCACCAGAGCGTT<br>ATTATTCATCCGGGAAAACCT<br>CTG                                                   | Reverse | Gibson<br>cloning  | Amplification of SteE<br>ΔN20            |
| pACEBac | GGGCGCGGATCCCGGTATGT<br>CTAGTGGTTCTGGTCATCACC<br>ATCAC                                                 | Forward | Gibson<br>cloning  | Amplification of GSK3β                   |
|         | TTTGAATTCCGCGCGCTTCG<br>GTCAGGTGGAGTTGGAAGCT<br>GATG                                                   | Reverse | Gibson<br>cloning  | Amplification of GSK3β                   |
|         | GGGCGCGGATCCCGGTATGA<br>AACATCACCATCACCATCACC<br>C                                                     | Forward | Gibson<br>cloning  | Amplification of STAT3                   |
|         | TTTGAATTCCGCGCGCTTCG<br>GTCACATGGGGGAGGTAGCG<br>CACTCCG                                                | Reverse | Gibson<br>cloning  | Amplification of STAT3                   |
